# Supplementary material for: Gold(i) and gold(iii) phosphine complexes: synthesis, anticancer activities towards 2D and 3D cancer models, and apoptosis inducing properties
Source: Royal Society of Chemistry journal article supplement (doi:10.1039/c8dt01724g), 2018-01-01
Supplement: c8dt01724g1.pdf [file c8dt01724g1.pdf]

# **Gold(I) and Gold(III) Phosphine Complexes: Synthesis, Anticancer Activities Towards 2D and 3D Cancer Models, and Apoptosis Inducing Properties**

## **Contents**

### **1. Characterization of gold complexes (1-10)**

Figures S1-S10:  $^1\text{H}$  and  $^{31}\text{P}$  NMR Spectra

### **2. Crystal and structure refinement data for complexes 4-10**

Table S1

### **3. Crystal structure diagrams for complexes 4,6,7, 8 and 10**

Figures S11- S15

### **4. Stability studies in $\text{DMSO-}d_6$**

Figures S16- S25

### **5. Stability studies in $\text{DMSO-}d_6$**

Figure S26.

### Characterization of gold complexes (1-10)

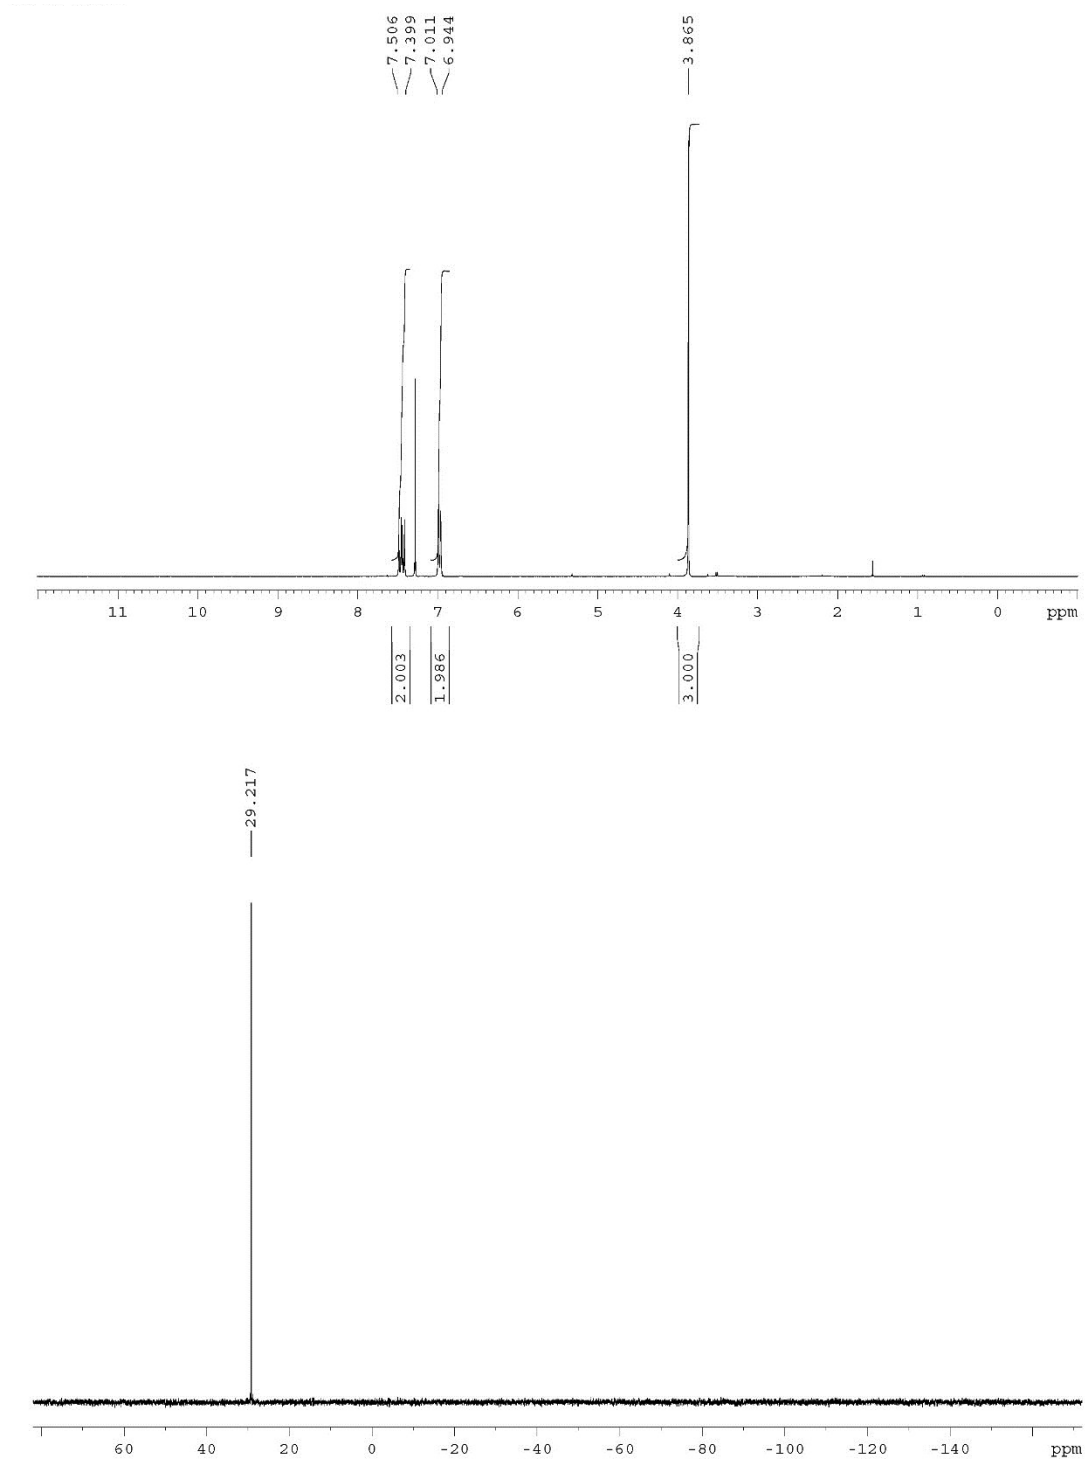

Figure S1.  $^1\text{H}$  NMR and  $^{31}\text{P}$  NMR spectra of complex 1

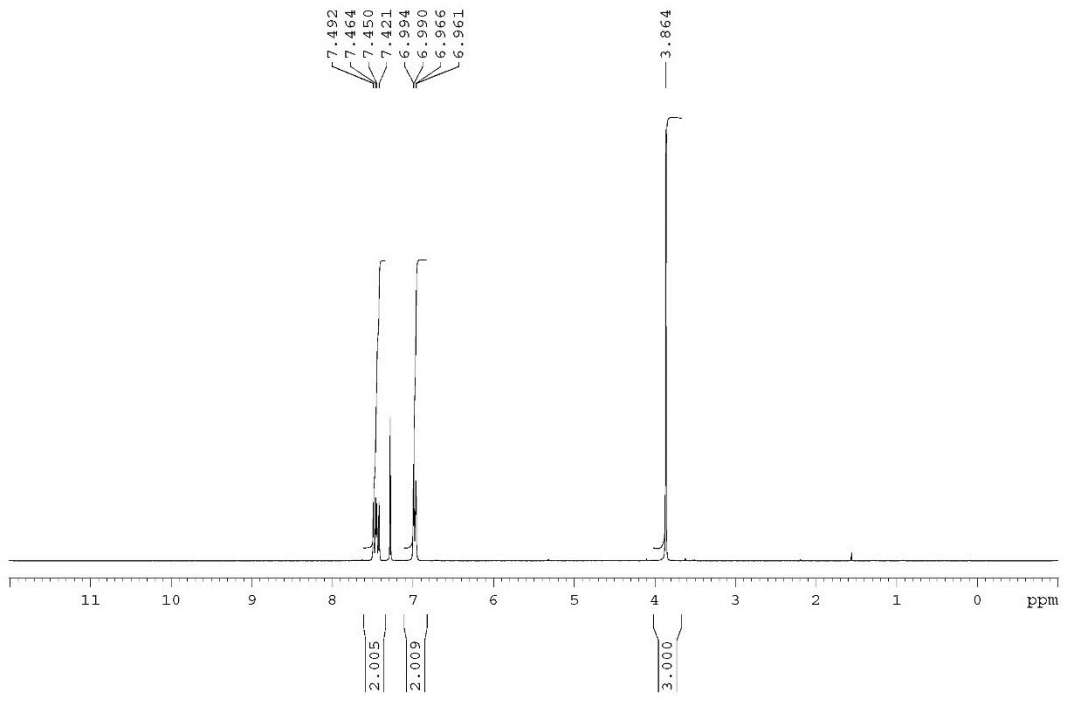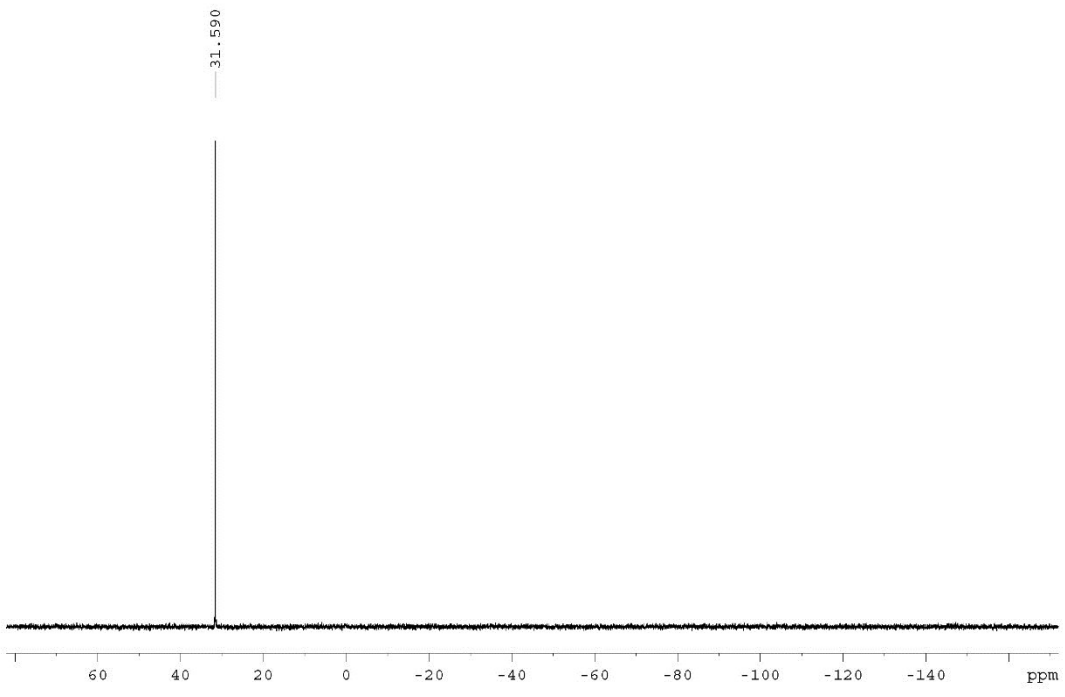

Figure S2.  $^1\text{H}$  NMR and  $^{31}\text{P}$  NMR spectra of complex **2**

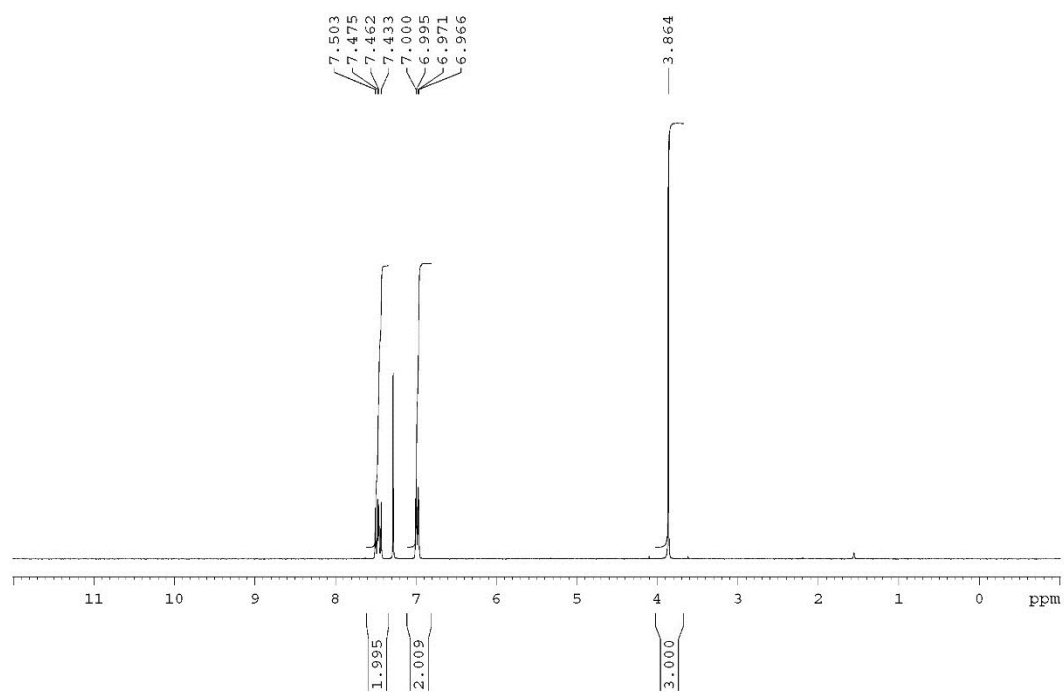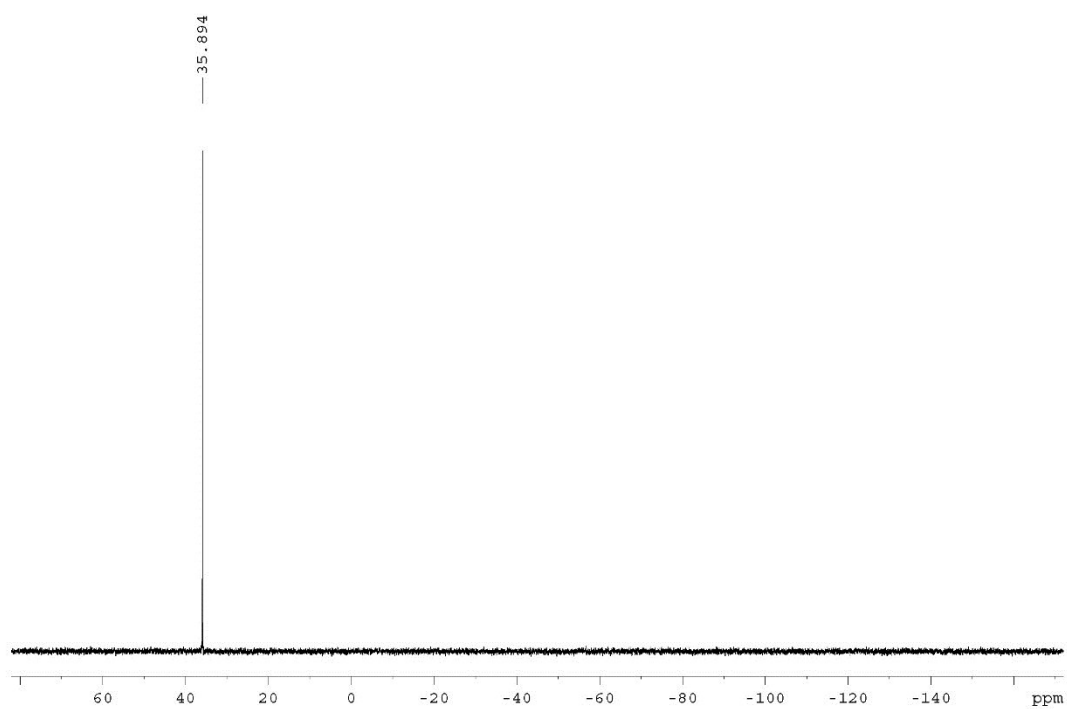

Figure S3.  $^1\text{H}$  NMR and  $^{31}\text{P}$  NMR spectra of complex **3**

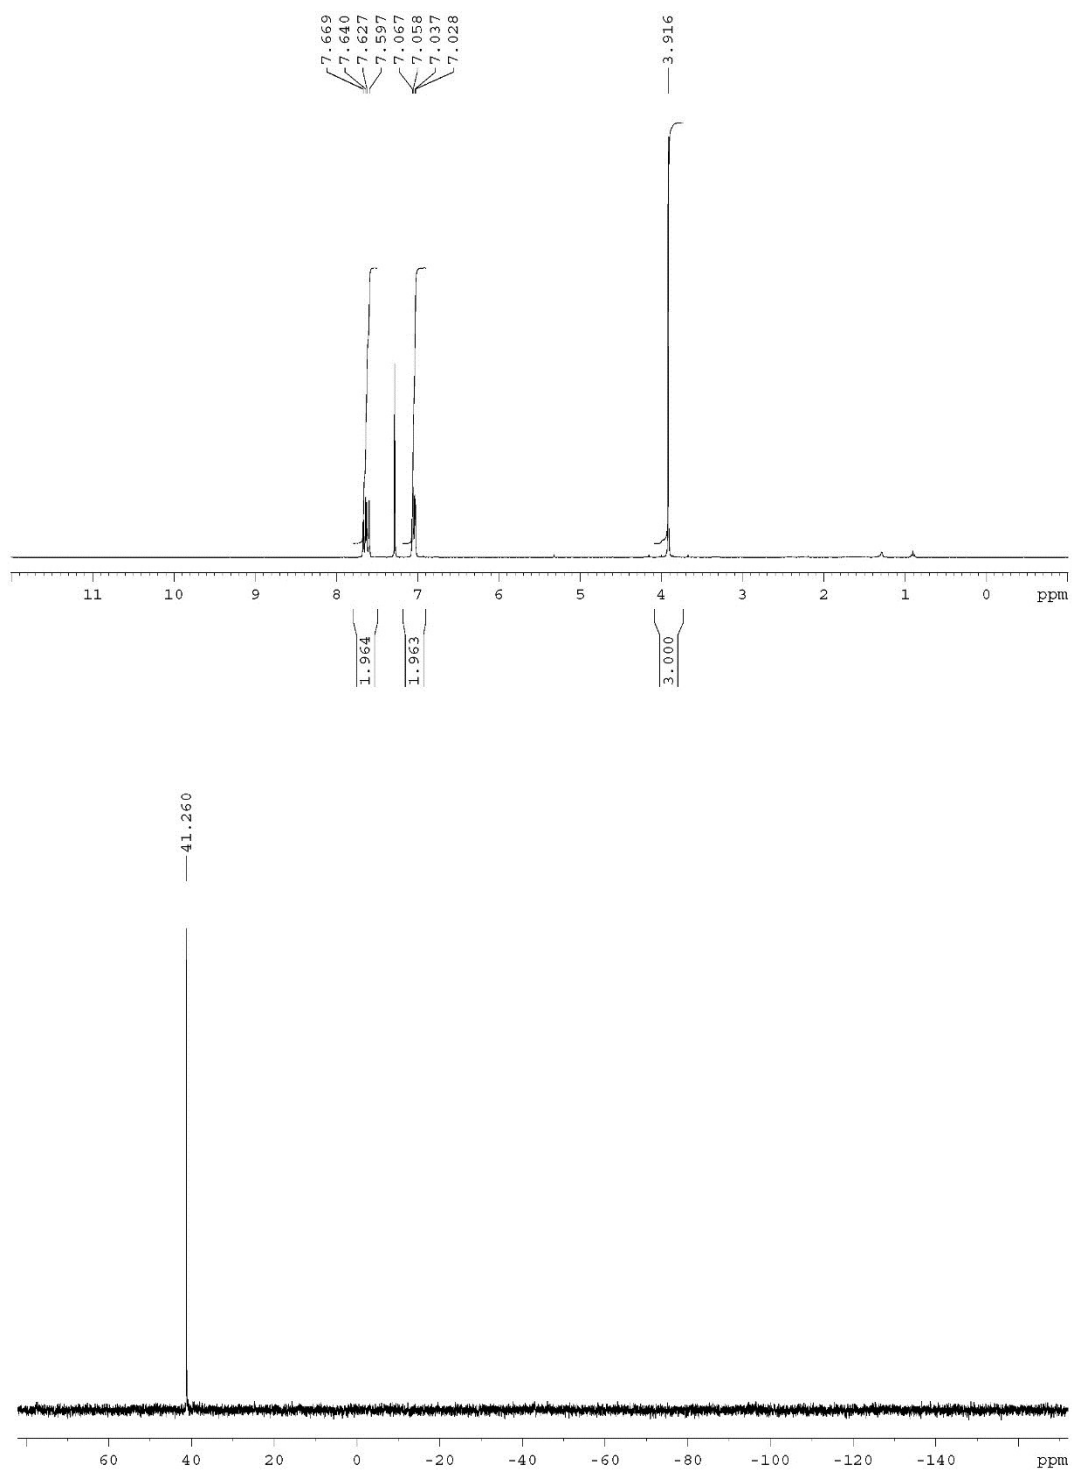

Figure S4.  $^1\text{H}$  NMR and  $^{31}\text{P}$  NMR spectra of complex 4

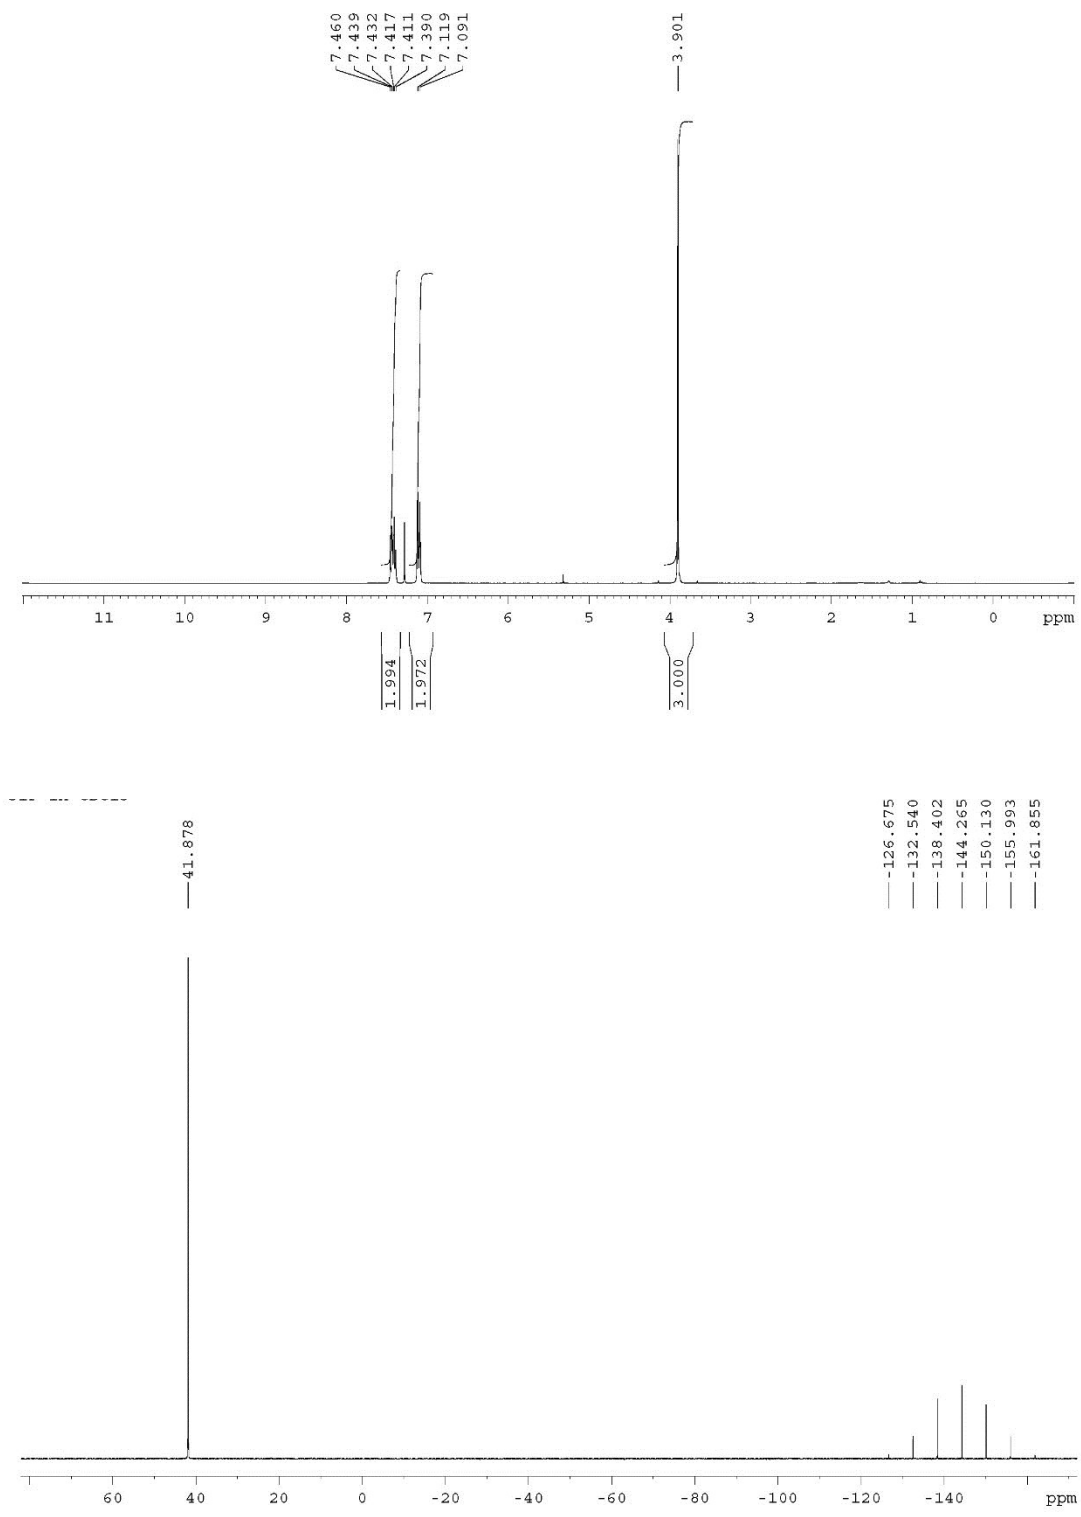

Figure S5.  $^1\text{H}$  NMR and  $^{31}\text{P}$  NMR spectra of complex 5

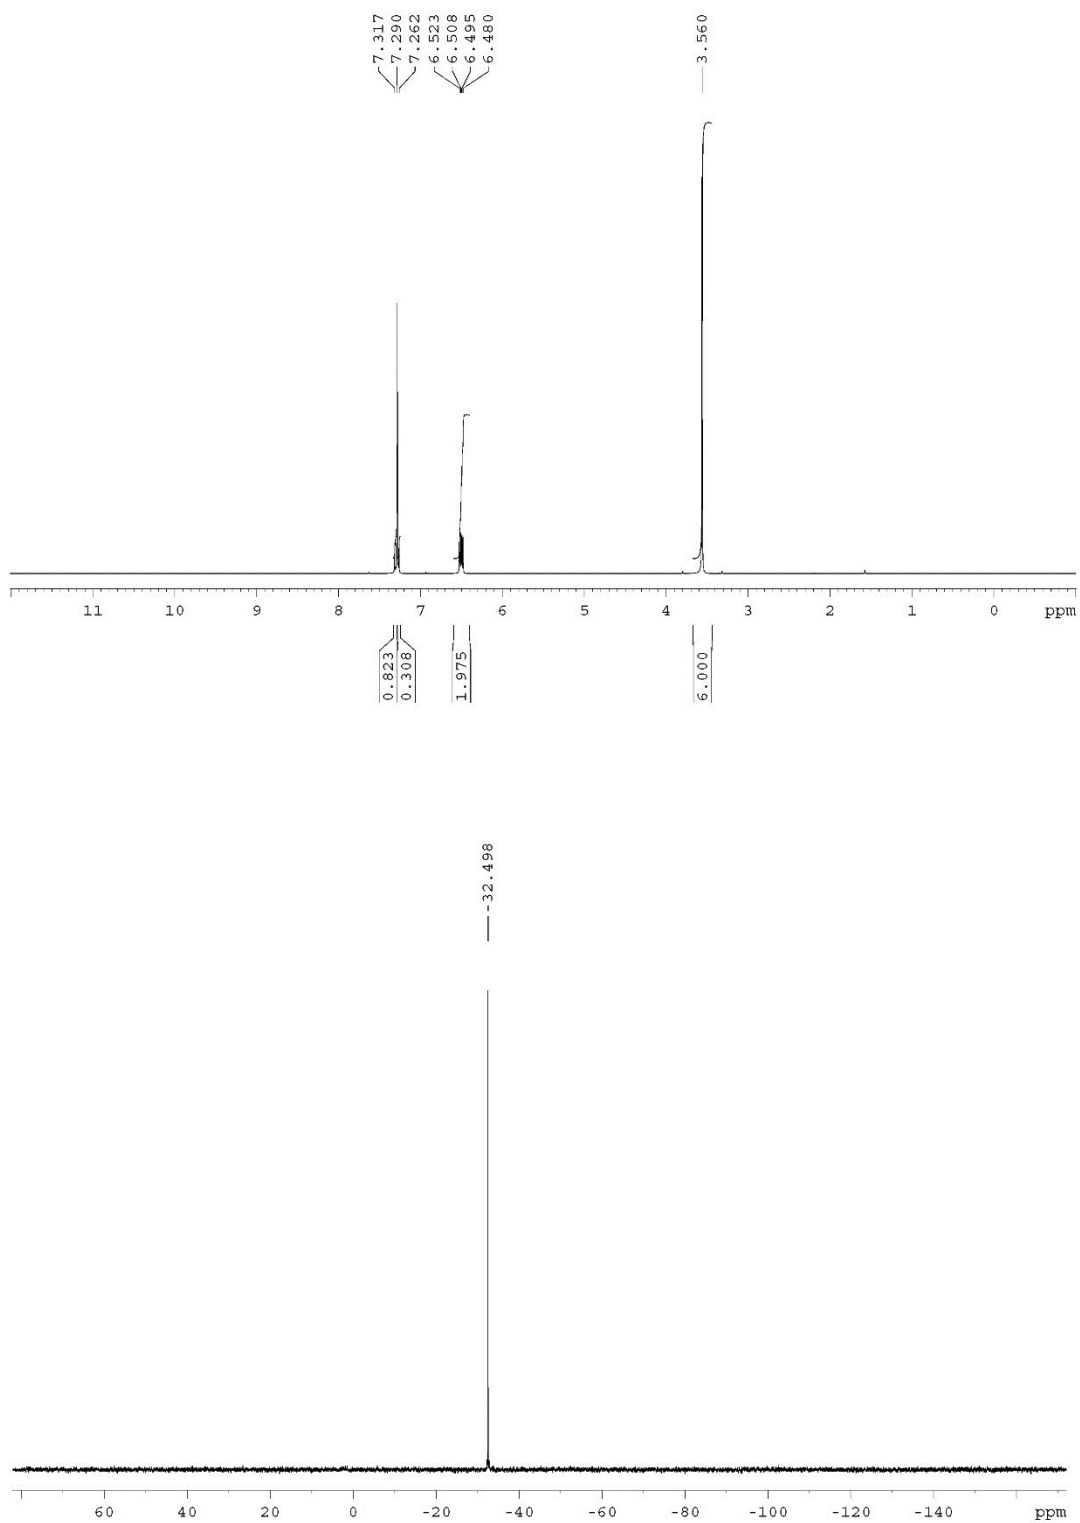

Figure S6.  $^1\text{H}$  NMR and  $^{31}\text{P}$  NMR spectra of complex 6

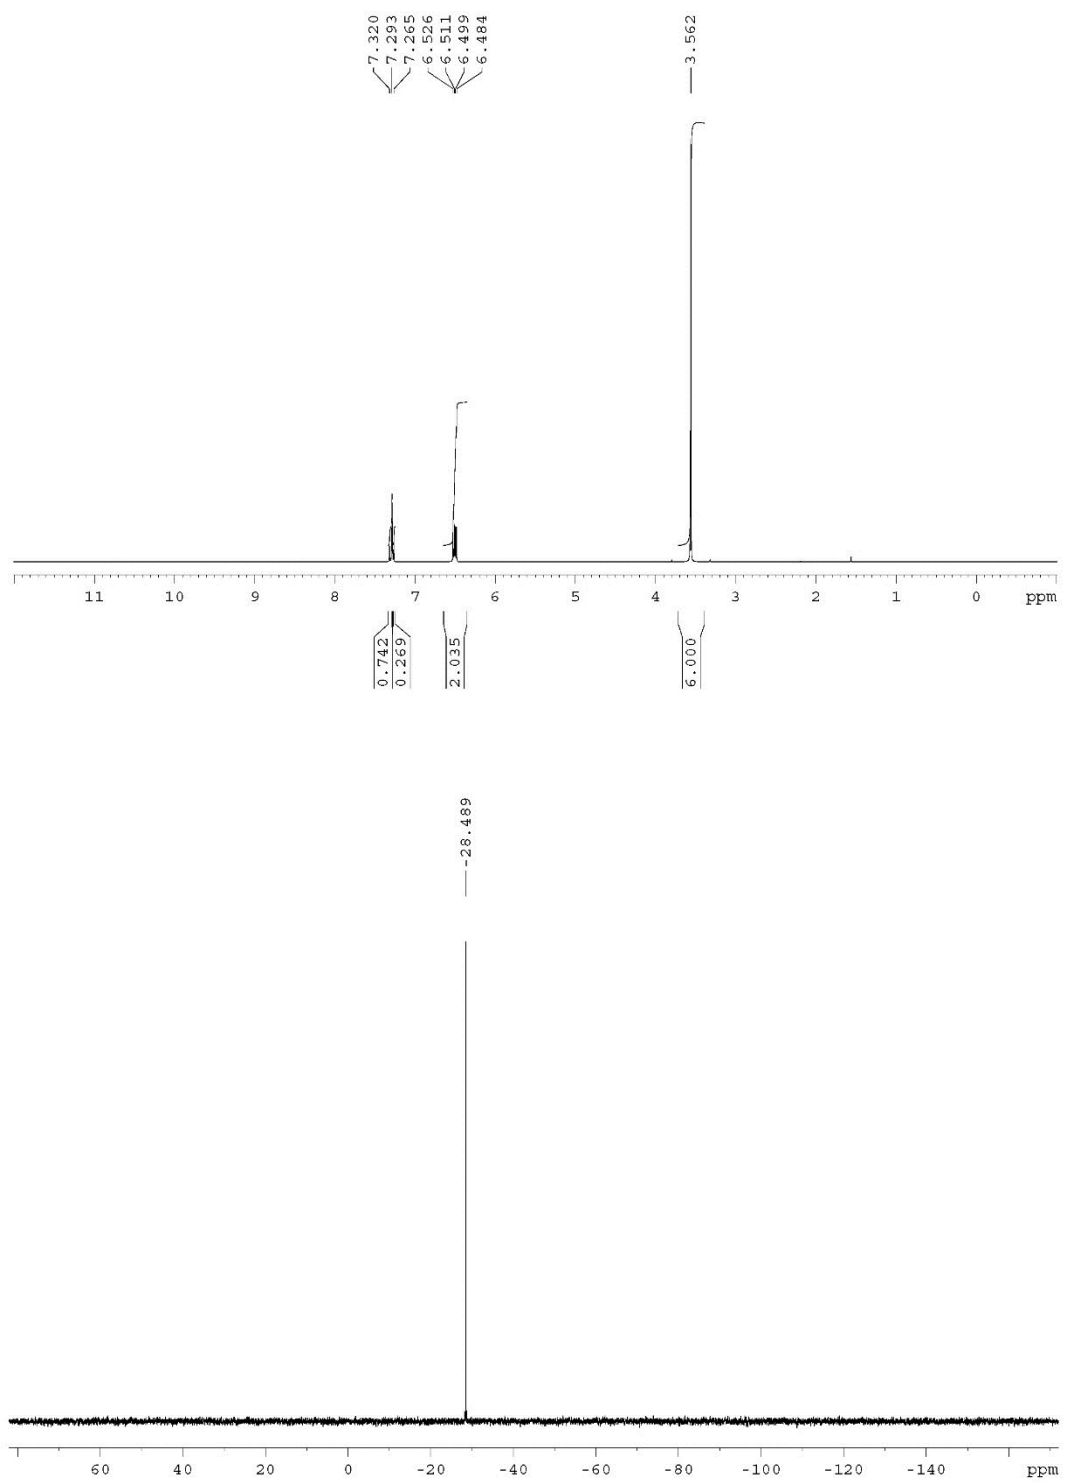

Figure S7.  $^1\text{H}$  NMR and  $^{31}\text{P}$  NMR spectra of complex 7



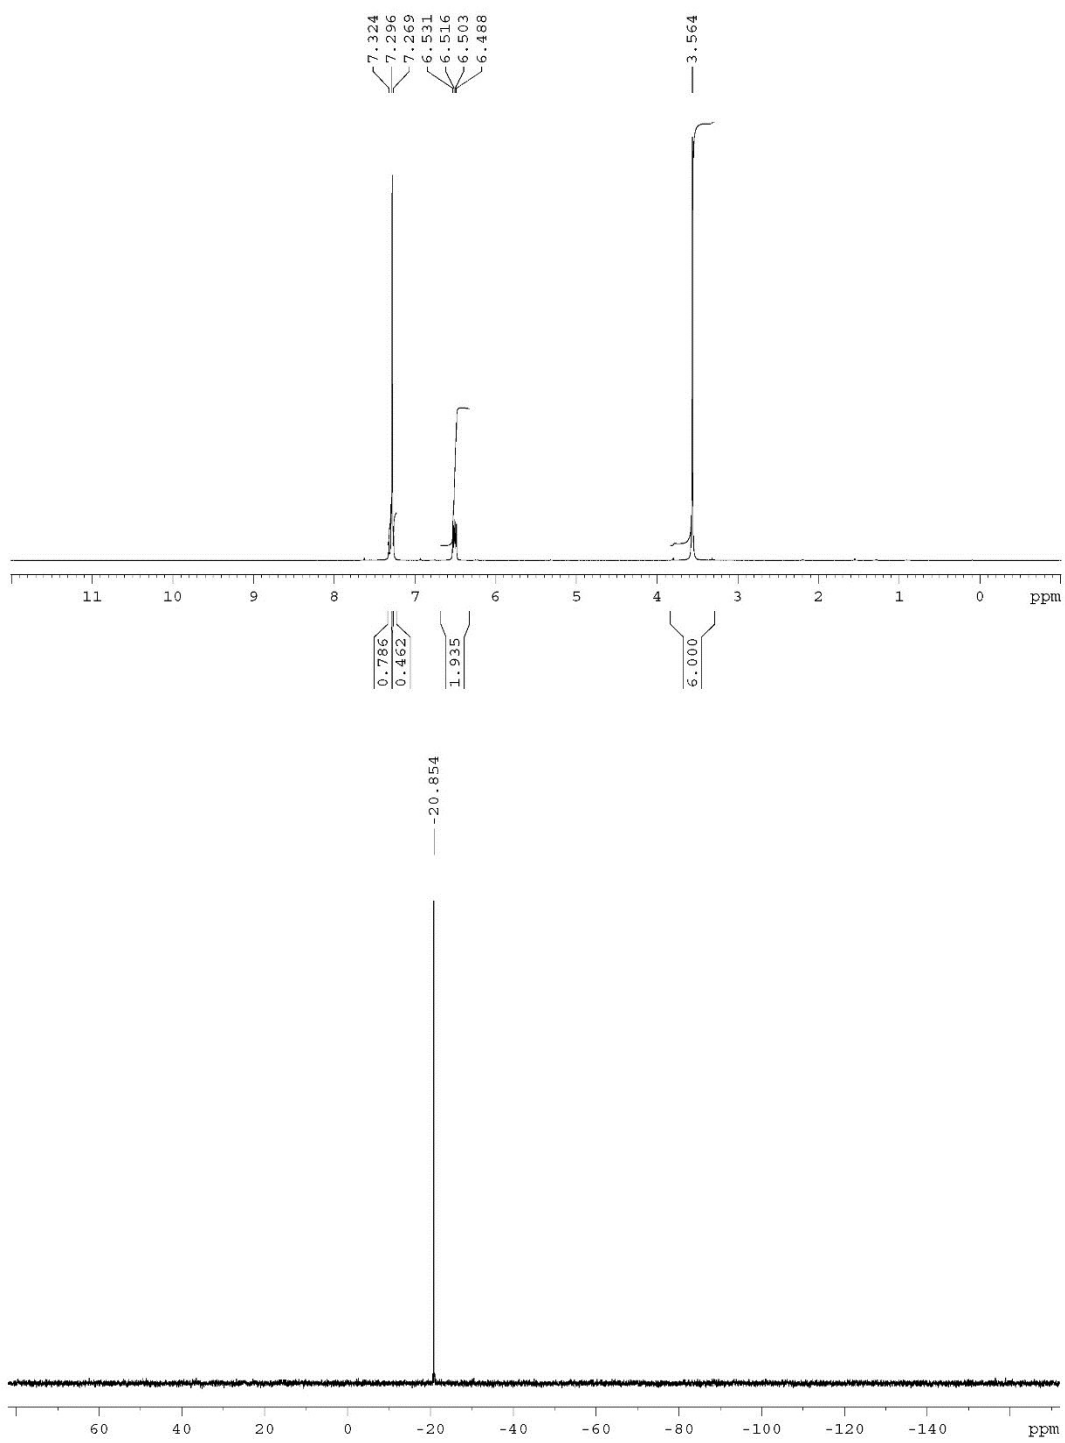

Figure S8.  $^1\text{H}$  NMR and  $^{31}\text{P}$  NMR spectra of complex **8**

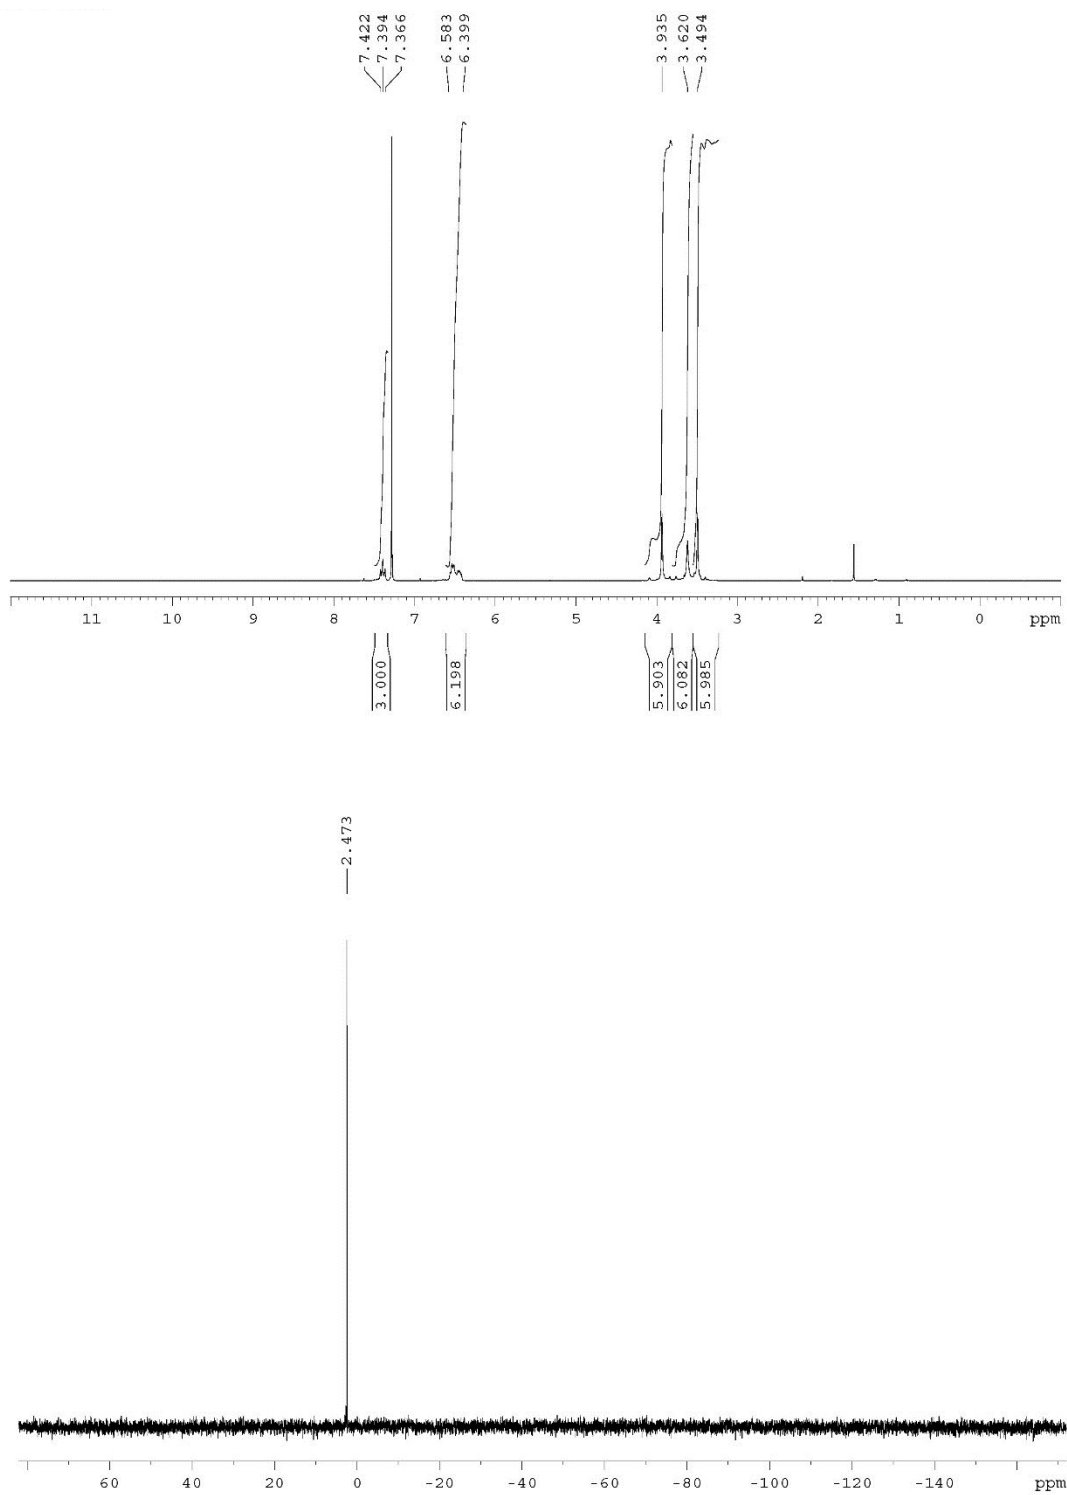

Figure S9.  $^1\text{H}$  NMR and  $^{31}\text{P}$  NMR spectra of complex 9

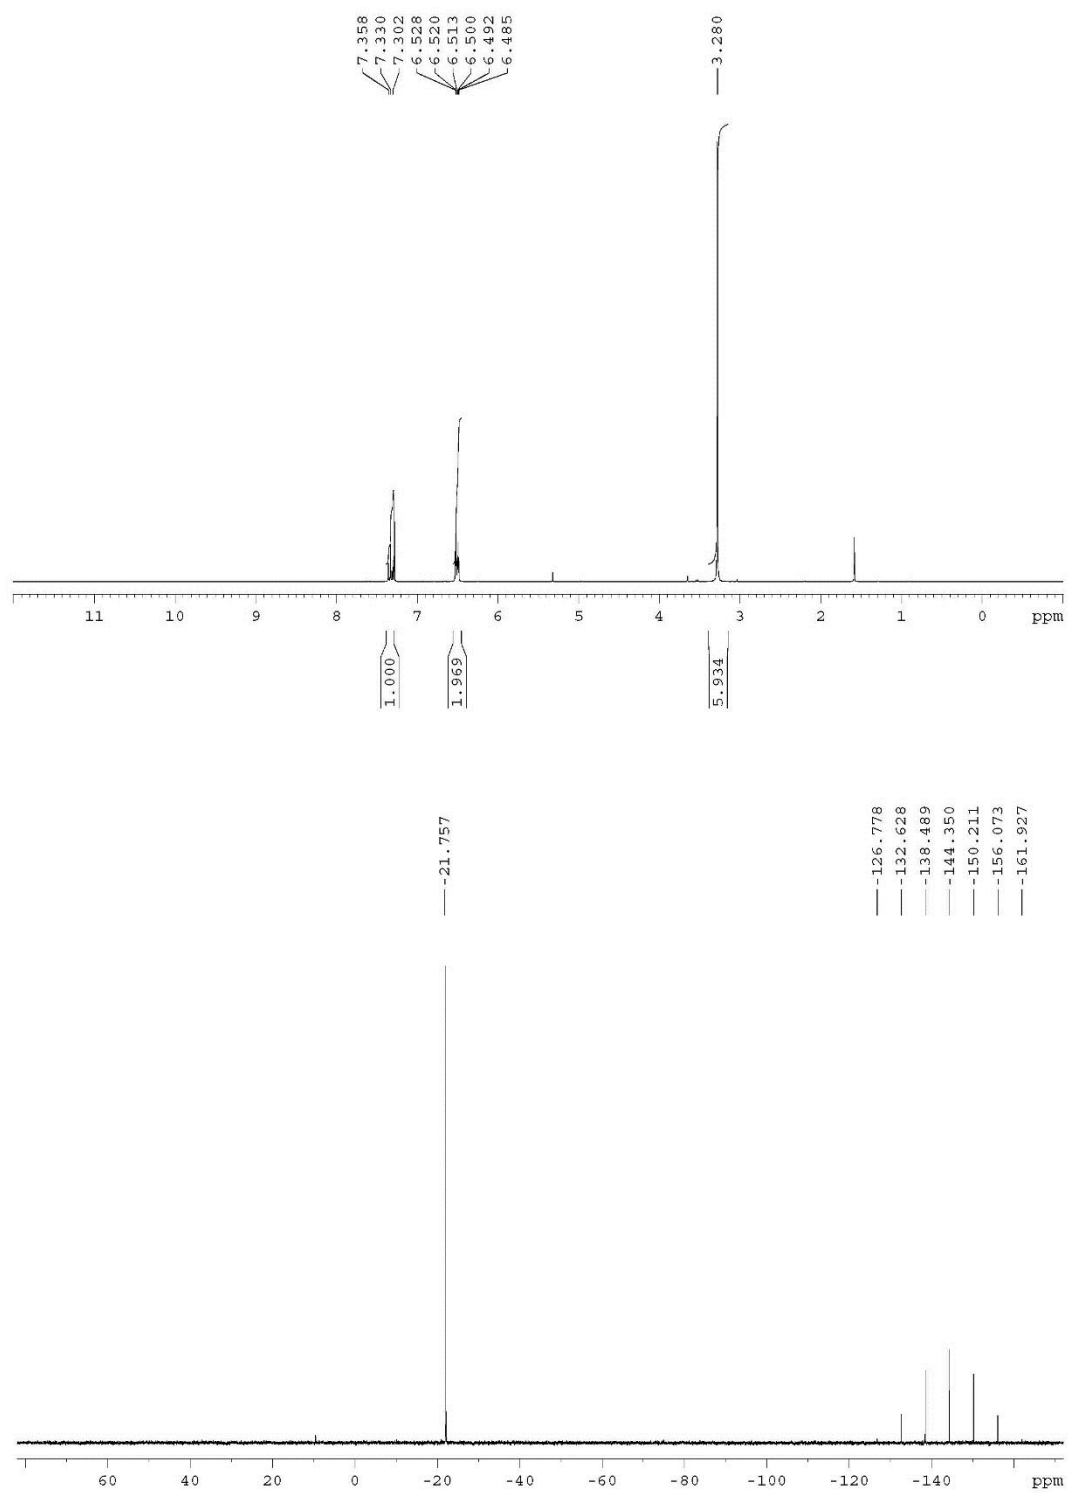

Figure S10.  $^1\text{H}$  NMR and  $^{31}\text{P}$  NMR spectra of complex 10

**Table S1.** Crystal and structure refinement data for complexes **4-10**

| <b>Compound</b>                                        | <b>4</b>                                                                    | <b>5</b>                                                                                 |
|--------------------------------------------------------|-----------------------------------------------------------------------------|------------------------------------------------------------------------------------------|
| Formula                                                | [AuCl <sub>3</sub> {P(C <sub>6</sub> H <sub>4</sub> -4-OMe) <sub>3</sub> }] | [Au{P(C <sub>6</sub> H <sub>4</sub> -4-OMe) <sub>3</sub> } <sub>2</sub> ]PF <sub>6</sub> |
| fw                                                     | 655.66                                                                      | 1131.56                                                                                  |
| Crystal system                                         | triclinic                                                                   | triclinic                                                                                |
| Space group                                            | P-1                                                                         | P-1                                                                                      |
| <i>a</i> , Å                                           | 9.943(2)                                                                    | 9.5056(15)                                                                               |
| <i>b</i> , Å                                           | 10.966(3)                                                                   | 11.8716(19)                                                                              |
| <i>c</i> , Å                                           | 11.238(3)                                                                   | 20.347(3)                                                                                |
| $\alpha$ , deg                                         | 72.292(5)                                                                   | 92.365(3)                                                                                |
| $\beta$ , deg                                          | 74.571(5)                                                                   | 95.981(3)                                                                                |
| $\gamma$ , deg                                         | 76.643(5)                                                                   | 102.177(4)                                                                               |
| <i>V</i> , Å <sup>3</sup>                              | 1110.1(5)                                                                   | 2227.5(6)                                                                                |
| <i>Z</i>                                               | 2                                                                           | 2                                                                                        |
| Cryst dimens (mm)                                      | 0.23 × 0.05 × 0.04                                                          | 0.19 × 0.13 × 0.07                                                                       |
| $\rho_{\text{calc}}$ (g/cm <sup>3</sup> )              | 1.962                                                                       | 1.687                                                                                    |
| $\mu$ (mm <sup>-1</sup> )                              | 7.080                                                                       | 3.602                                                                                    |
| <i>T</i> , K                                           | 150(2)                                                                      | 150(2)                                                                                   |
| Radiation                                              | Mo K $\alpha$ ( $\lambda$ = 0.71073 Å)                                      | Mo K $\alpha$ ( $\lambda$ = 0.71073 Å)                                                   |
| 2 $\theta$ range for data collection                   | 3.892 to 59.996                                                             | 3.518 to 60                                                                              |
| Index ranges                                           | -13 ≤ <i>h</i> ≤ 13, -15 ≤ <i>k</i> ≤ 15, -15 ≤ <i>l</i> ≤ 15               | -13 ≤ <i>h</i> ≤ 13, -16 ≤ <i>k</i> ≤ 16, -28 ≤ <i>l</i> ≤ 28                            |
| Reflections collected                                  | 45188                                                                       | 81312                                                                                    |
| Independent reflections                                | 6462 [R <sub>int</sub> = 0.0326, R <sub>sigma</sub> = 0.0169]               | 13011 [R <sub>int</sub> = 0.0358, R <sub>sigma</sub> = 0.0221]                           |
| Data/restraints/parameters                             | 6462/0/265                                                                  | 13011/42/572                                                                             |
| Goodness-of-fit on <i>F</i> <sup>2</sup>               | 1.048                                                                       | 1.033                                                                                    |
| Final R indexes [ <i>I</i> >= 2 $\sigma$ ( <i>I</i> )] | R <sub>1</sub> = 0.0142, wR <sub>2</sub> = 0.0364                           | R <sub>1</sub> = 0.0236, wR <sub>2</sub> = 0.0585                                        |
| Final R indexes [all data]                             | R <sub>1</sub> = 0.0155, wR <sub>2</sub> = 0.0370                           | R <sub>1</sub> = 0.0280, wR <sub>2</sub> = 0.0608                                        |
| Largest diff. peak/hole / e Å <sup>-3</sup>            | 1.88/-0.47                                                                  | 0.99/-1.04                                                                               |

| <b>Compound</b>                                        | <b>6</b>                                                                        | <b>7</b>                                                                        |
|--------------------------------------------------------|---------------------------------------------------------------------------------|---------------------------------------------------------------------------------|
| Formula                                                | [AuCl{P(C <sub>6</sub> H <sub>3</sub> -2,6-{OMe} <sub>2</sub> ) <sub>3</sub> }] | [AuBr{P(C <sub>6</sub> H <sub>3</sub> -2,6-{OMe} <sub>2</sub> ) <sub>3</sub> }] |
| fw                                                     | 674.84                                                                          | 804.23                                                                          |
| Crystal system                                         | triclinic                                                                       | orthorhombic                                                                    |
| Space group                                            | P-1                                                                             | Pna2 <sub>1</sub>                                                               |
| <i>a</i> , Å                                           | 10.874(2)                                                                       | 14.422(3)                                                                       |
| <i>b</i> , Å                                           | 14.940(3)                                                                       | 16.702(3)                                                                       |
| <i>c</i> , Å                                           | 16.308(3)                                                                       | 11.860(2)                                                                       |
| $\alpha$ , deg                                         | 107.912(4)                                                                      | 90                                                                              |
| $\beta$ , deg                                          | 91.326(4)                                                                       | 90                                                                              |
| $\gamma$ , deg                                         | 93.609(4)                                                                       | 90                                                                              |
| <i>V</i> , Å <sup>3</sup>                              | 2513.4(9)                                                                       | 2856.9(9)                                                                       |
| <i>Z</i>                                               | 4                                                                               | 4                                                                               |
| Cryst dimens (mm)                                      | 0.29 × 0.06 × 0.04                                                              | 0.27 × 0.08 × 0.08                                                              |
| $\rho_{\text{calc}}$ (g/cm <sup>3</sup> )              | 1.783                                                                           | 1.870                                                                           |
| $\mu$ (mm <sup>-1</sup> )                              | 6.060                                                                           | 6.828                                                                           |
| <i>T</i> , K                                           | 150(2)                                                                          | 150(2)                                                                          |
| Radiation                                              | Mo K $\alpha$ ( $\lambda$ = 0.71073 Å)                                          | Mo K $\alpha$ ( $\lambda$ = 0.71073 Å)                                          |
| 2 $\theta$ range for data collection                   | 3.238 to 65                                                                     | 3.732 to 64.998                                                                 |
| Index ranges                                           | -16 ≤ <i>h</i> ≤ 16, -22 ≤ <i>k</i> ≤ 22, -24 ≤ <i>l</i> ≤ 24                   | -21 ≤ <i>h</i> ≤ 21, -25 ≤ <i>k</i> ≤ 25, -17 ≤ <i>l</i> ≤ 17                   |
| Reflections collected                                  | 125615                                                                          | 73847                                                                           |
| Independent reflections                                | 18205 [R <sub>int</sub> = 0.0333, R <sub>sigma</sub> = 0.0207]                  | 10314 [R <sub>int</sub> = 0.0282, R <sub>sigma</sub> = 0.0275]                  |
| Data/restraints/parameters                             | 18205/0/607                                                                     | 10314/8/348                                                                     |
| Goodness-of-fit on <i>F</i> <sup>2</sup>               | 1.015                                                                           | 0.947                                                                           |
| Final R indexes [ <i>I</i> >= 2 $\sigma$ ( <i>I</i> )] | R <sub>1</sub> = 0.0170, wR <sub>2</sub> = 0.0354                               | R <sub>1</sub> = 0.0129, wR <sub>2</sub> = 0.0295                               |
| Final R indexes [all data]                             | R <sub>1</sub> = 0.0229, wR <sub>2</sub> = 0.0370                               | R <sub>1</sub> = 0.0151, wR <sub>2</sub> = 0.0300                               |
| Largest diff. peak/hole / e Å <sup>-3</sup>            | 0.67/-0.56                                                                      | 0.59/-0.51                                                                      |

| Compound                                    | 8                                                                                  | 9                                                                                             |
|---------------------------------------------|------------------------------------------------------------------------------------|-----------------------------------------------------------------------------------------------|
| Formula                                     | [ [AuI{P(C <sub>6</sub> H <sub>3</sub> -2,6-{OMe} <sub>2</sub> ) <sub>3</sub> }] ] | [AuCl <sub>3</sub> {P(C <sub>6</sub> H <sub>3</sub> -2,6-{OMe} <sub>2</sub> ) <sub>3</sub> }] |
| fw                                          | 851.22                                                                             | 830.67                                                                                        |
| Crystal system                              | orthorhombic                                                                       | monoclinic                                                                                    |
| Space group                                 | Pna2 <sub>1</sub>                                                                  | P2 <sub>1</sub> /n                                                                            |
| a, Å                                        | 14.496(7)                                                                          | 10.764(2)                                                                                     |
| b, Å                                        | 16.885(8)                                                                          | 20.118(4)                                                                                     |
| c, Å                                        | 11.951(5)                                                                          | 14.621(3)                                                                                     |
| α, deg                                      | 90                                                                                 | 90                                                                                            |
| β, deg                                      | 90                                                                                 | 107.320(4)                                                                                    |
| γ, deg                                      | 90                                                                                 | 90                                                                                            |
| V, Å <sup>3</sup>                           | 2925(2)                                                                            | 3022.4(11)                                                                                    |
| Z                                           | 4                                                                                  | 4                                                                                             |
| Cryst dims (mm)                             | 0.31 × 0.16 × 0.09                                                                 | 0.18 × 0.11 × 0.06                                                                            |
| ρ <sub>calc</sub> (g/cm <sup>3</sup> )      | 1.933                                                                              | 1.826                                                                                         |
| μ (mm <sup>-1</sup> )                       | 6.358                                                                              | 5.400                                                                                         |
| T, K                                        | 150(2)                                                                             | 150(2)                                                                                        |
| Radiation                                   | Mo Kα (λ = 0.71073 Å)                                                              | Mo Kα (λ = 0.71073 Å)                                                                         |
| 2θ range for data collection                | 3.702 to 54.99                                                                     | 3.552 to 65                                                                                   |
| Index ranges                                | -18 ≤ h ≤ 18, -19 ≤ k ≤ 21, -15 ≤ l ≤ 15                                           | -16 ≤ h ≤ 14, -30 ≤ k ≤ 30, -22 ≤ l ≤ 22                                                      |
| Reflections collected                       | 42149                                                                              | 73853                                                                                         |
| Independent reflections                     | 6638 [R <sub>int</sub> = 0.0249, R <sub>sigma</sub> = 0.0270]                      | 10938 [R <sub>int</sub> = 0.0333, R <sub>sigma</sub> = 0.0209]                                |
| Data/restraints/parameters                  | 6638/8/361                                                                         | 10938/0/349                                                                                   |
| Goodness-of-fit on F <sup>2</sup>           | 0.943                                                                              | 1.017                                                                                         |
| Final R indexes [I ≥ 2σ (I)]                | R <sub>1</sub> = 0.0100, wR <sub>2</sub> = 0.0258                                  | R <sub>1</sub> = 0.0213, wR <sub>2</sub> = 0.0444                                             |
| Final R indexes [all data]                  | R <sub>1</sub> = 0.0103, wR <sub>2</sub> = 0.0265                                  | R <sub>1</sub> = 0.0281, wR <sub>2</sub> = 0.0467                                             |
| Largest diff. peak/hole / e Å <sup>-3</sup> | 0.33/-0.43                                                                         | 1.84/-1.21                                                                                    |

| Compound                                    | 10                                                                                                         |
|---------------------------------------------|------------------------------------------------------------------------------------------------------------|
| Formula                                     | [Au{P(C <sub>6</sub> H <sub>3</sub> -2,6-{OMe} <sub>2</sub> ) <sub>3</sub> } <sub>2</sub> ]PF <sub>6</sub> |
| fw                                          | 1311.71                                                                                                    |
| Crystal system                              | triclinic                                                                                                  |
| Space group                                 | P-1                                                                                                        |
| a, Å                                        | 13.737(4)                                                                                                  |
| b, Å                                        | 14.454(5)                                                                                                  |
| c, Å                                        | 16.002(5)                                                                                                  |
| α, deg                                      | 68.210(7)                                                                                                  |
| β, deg                                      | 75.034(7)                                                                                                  |
| γ, deg                                      | 62.753(6)                                                                                                  |
| V, Å <sup>3</sup>                           | 2607.9(14)                                                                                                 |
| Z                                           | 2                                                                                                          |
| Cryst dims (mm)                             | 0.21 × 0.12 × 0.04                                                                                         |
| ρ <sub>calc</sub> (g/cm <sup>3</sup> )      | 1.670                                                                                                      |
| μ (mm <sup>-1</sup> )                       | 3.097                                                                                                      |
| T, K                                        | 150(2)                                                                                                     |
| Radiation                                   | Mo Kα (λ = 0.71073 Å)                                                                                      |
| 2θ range for data collection                | 2.756 to 54.998                                                                                            |
| Index ranges                                | -17 ≤ h ≤ 17, -18 ≤ k ≤ 18, -20 ≤ l ≤ 20                                                                   |
| Reflections collected                       | 79211                                                                                                      |
| Independent reflections                     | 11987 [R <sub>int</sub> = 0.0772, R <sub>sigma</sub> = 0.0419]                                             |
| Data/restraints/parameters                  | 11987/56/671                                                                                               |
| Goodness-of-fit on F <sup>2</sup>           | 1.066                                                                                                      |
| Final R indexes [I ≥ 2σ (I)]                | R <sub>1</sub> = 0.0307, wR <sub>2</sub> = 0.0720                                                          |
| Final R indexes [all data]                  | R <sub>1</sub> = 0.0348, wR <sub>2</sub> = 0.0739                                                          |
| Largest diff. peak/hole / e Å <sup>-3</sup> | 1.63/-1.12                                                                                                 |

## Crystal structure diagrams of the complexes

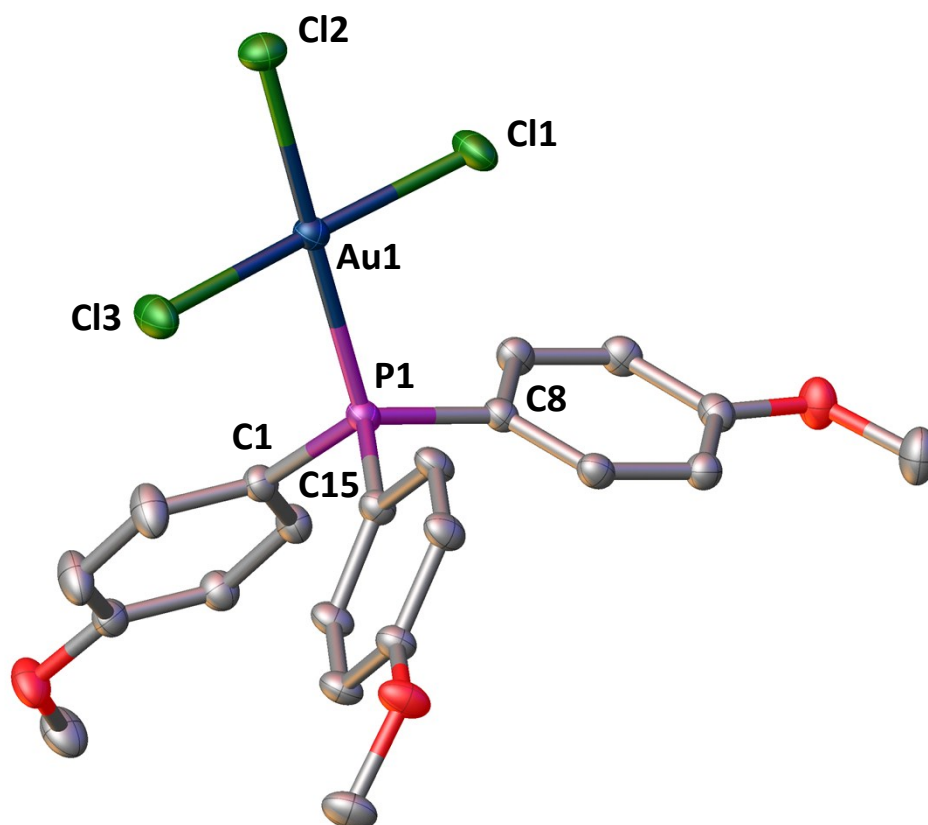

Figure S11. Molecular structure of  $[\text{AuCl}_3\{\text{P}(\text{C}_6\text{H}_4\text{-4-OMe})_3\}]$  (**4**). Ellipsoids show 50% probability levels and hydrogen atoms have been omitted for clarity. Selected bond distances ( $\text{\AA}$ ) and angles ( $^\circ$ ): Au(1)-P(1) 2.3394(6), Au(1)-Cl(1) 2.2766(7), Au(1)-Cl(2) 2.3668(6), Au(1)-Cl(3) 2.2907(7), Cl(2)-Au(1)-P(1) 176.687(16).

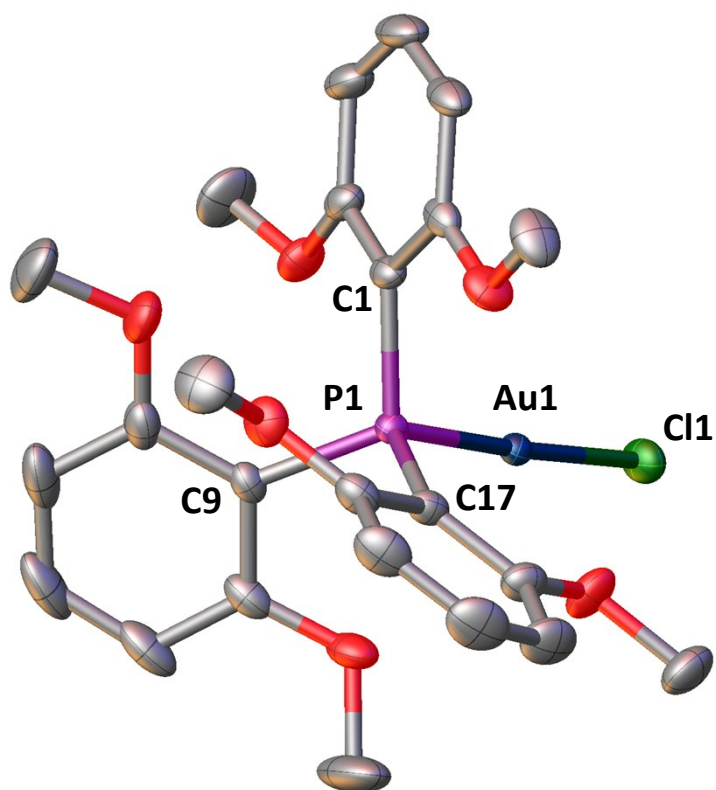

Figure S12. Molecular structure of  $[\text{AuCl}\{\text{P}(\text{C}_6\text{H}_3\text{-}2,6\text{-}\{\text{OMe}\}_2)_3\}]$  (**6**). Ellipsoids show 50% probability levels and hydrogen atoms have been omitted for clarity. Selected bond distances ( $\text{\AA}$ ) and angles ( $^\circ$ ): Au(1)-P(1) 2.2416(5), Au(1)-Cl(1) 2.2965(5), Cl(1)-Au(1)-P(1) 177.099(15).

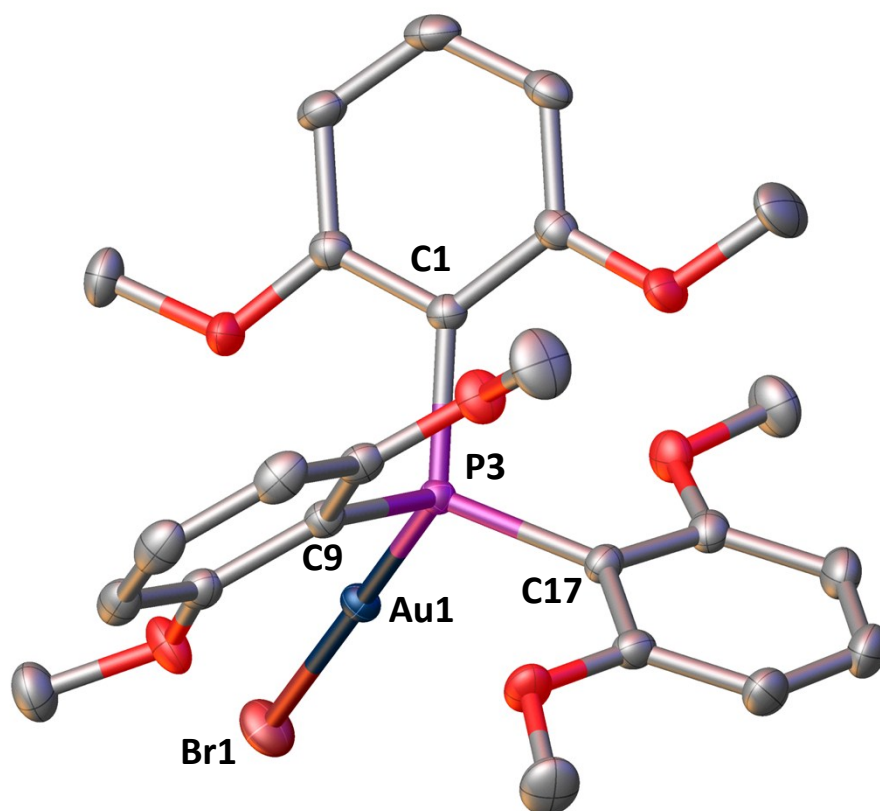

Figure S13. Molecular structure of  $[\text{AuBr}\{\text{P}(\text{C}_6\text{H}_3\text{-}2,6\text{-}\{\text{OMe}\}_2)_3\}]$  (7). Ellipsoids show 50% probability levels and hydrogen atoms have been omitted for clarity. Selected bond distances ( $\text{\AA}$ ) and angles ( $^\circ$ ): Au(1)-P(3) 2.2530(7), Au(1)-Br(1) 2.4227(5), Br(1)-Au(1)-P(3) 175.510(15).



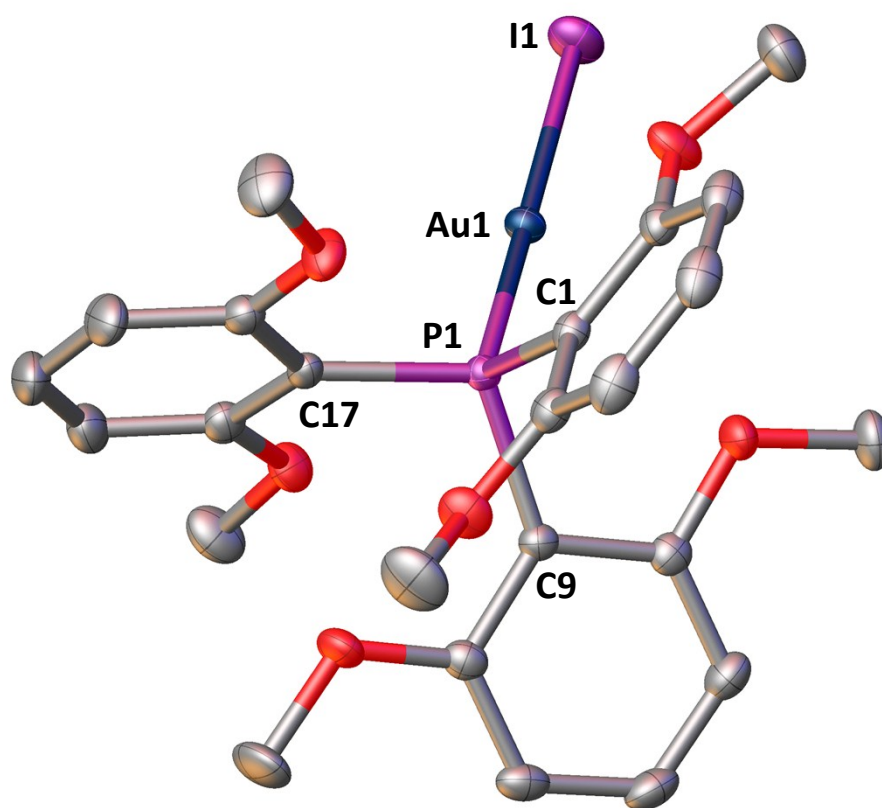

Figure S14. Molecular structure of  $[\text{AuI}\{\text{P}(\text{C}_6\text{H}_3\text{-}2,6\text{-}\{\text{OMe}\}_2)_3\}]$  (**8**). Ellipsoids show 50% probability levels and hydrogen atoms have been omitted for clarity. Selected bond distances ( $\text{\AA}$ ) and angles ( $^\circ$ ): Au(1)-P(1) 2.2662(12), Au(1)-I(1) 2.5687(10), I(1)-Au(1)-P(1) 174.268(18).

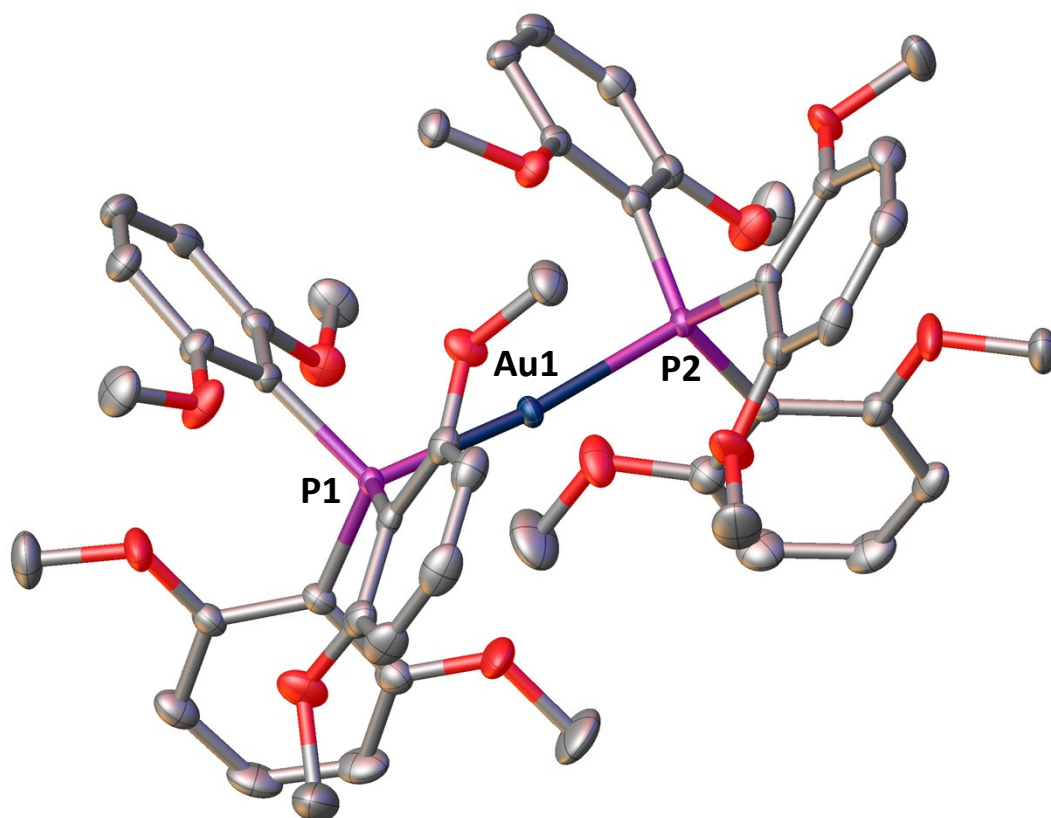

Figure S15. Molecular structure of  $[\text{Au}\{\text{P}(\text{C}_6\text{H}_3\text{-}2,6\text{-}\{\text{OMe}\}_2)_3\}_2]\text{PF}_6$  (**10**). Ellipsoids show 50% probability levels. Hydrogen atoms and  $\text{PF}_6$  counter ion have been omitted for clarity. Selected bond distances ( $\text{\AA}$ ) and angles ( $^\circ$ ): Au(1)-P(1) 2.3250(10), Au(1)-P(2) 2.3381(10), P(1)-Au(1)-P(2) 173.56(3).

## Stability studies in DMSO-*d*<sub>6</sub>

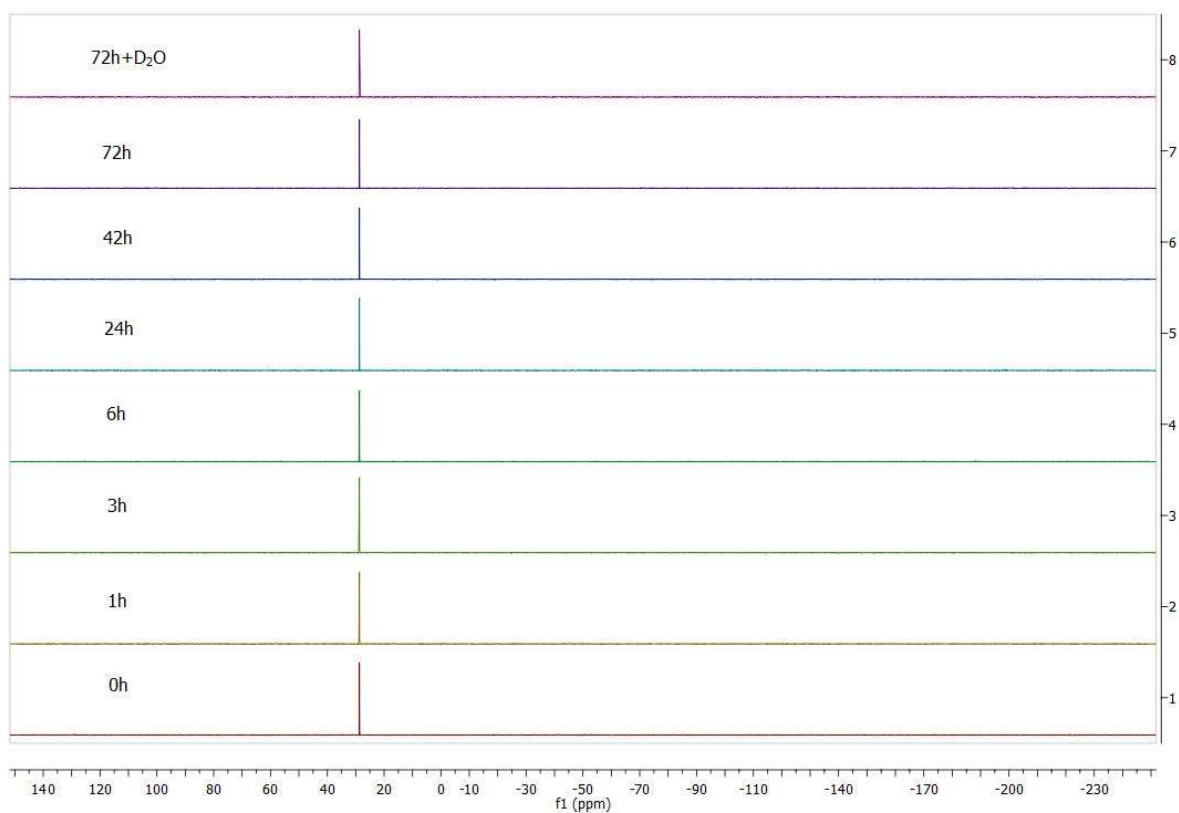

Figure S16. <sup>31</sup>P NMR spectrum of **1** in DMSO-*d*<sub>6</sub> over a 72 h time period

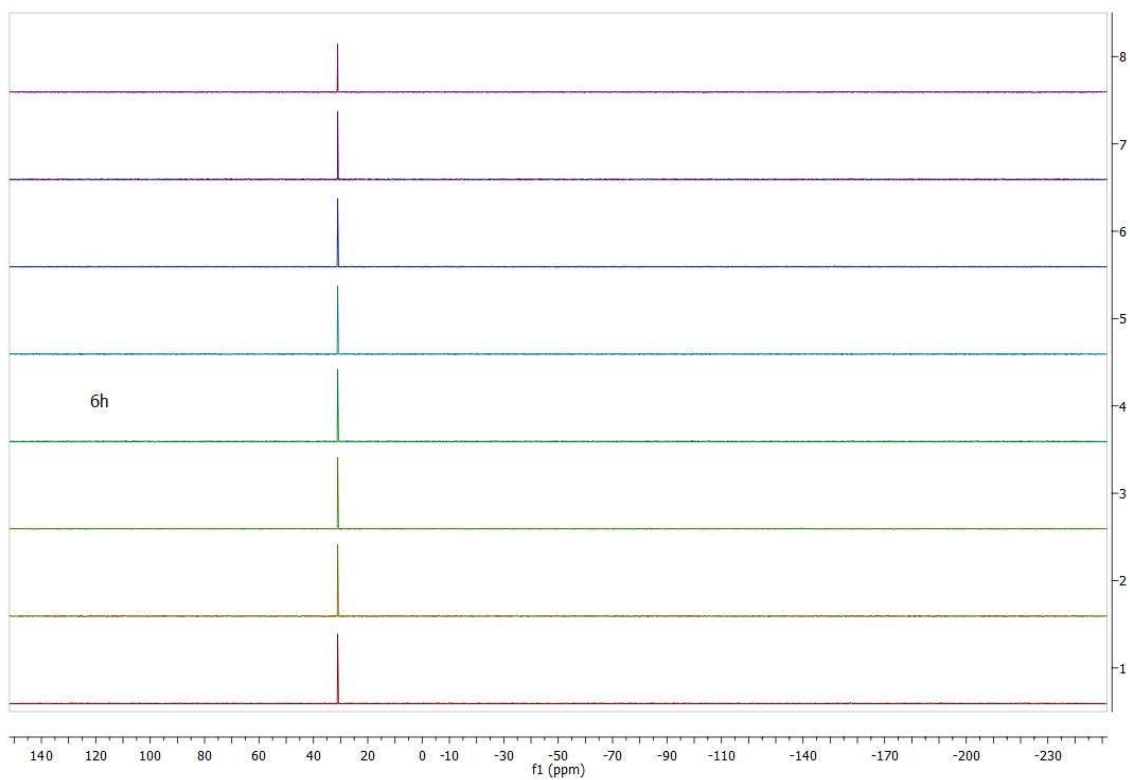

Figure S17. <sup>31</sup>P NMR spectrum of **2** in DMSO-*d*<sub>6</sub> over a 72 h time period

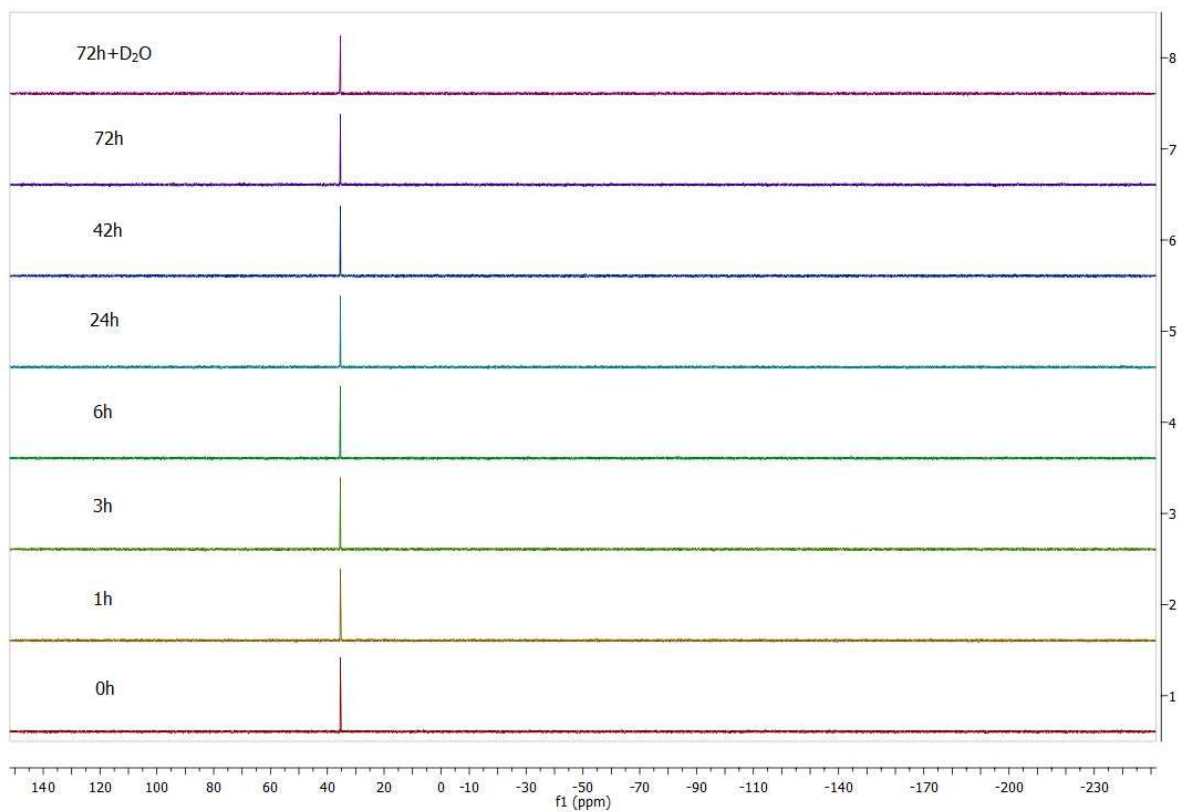

Figure S18.  $^{31}\text{P}$  NMR spectrum of **3** in  $\text{DMSO-}d_6$  over a 72 h time period

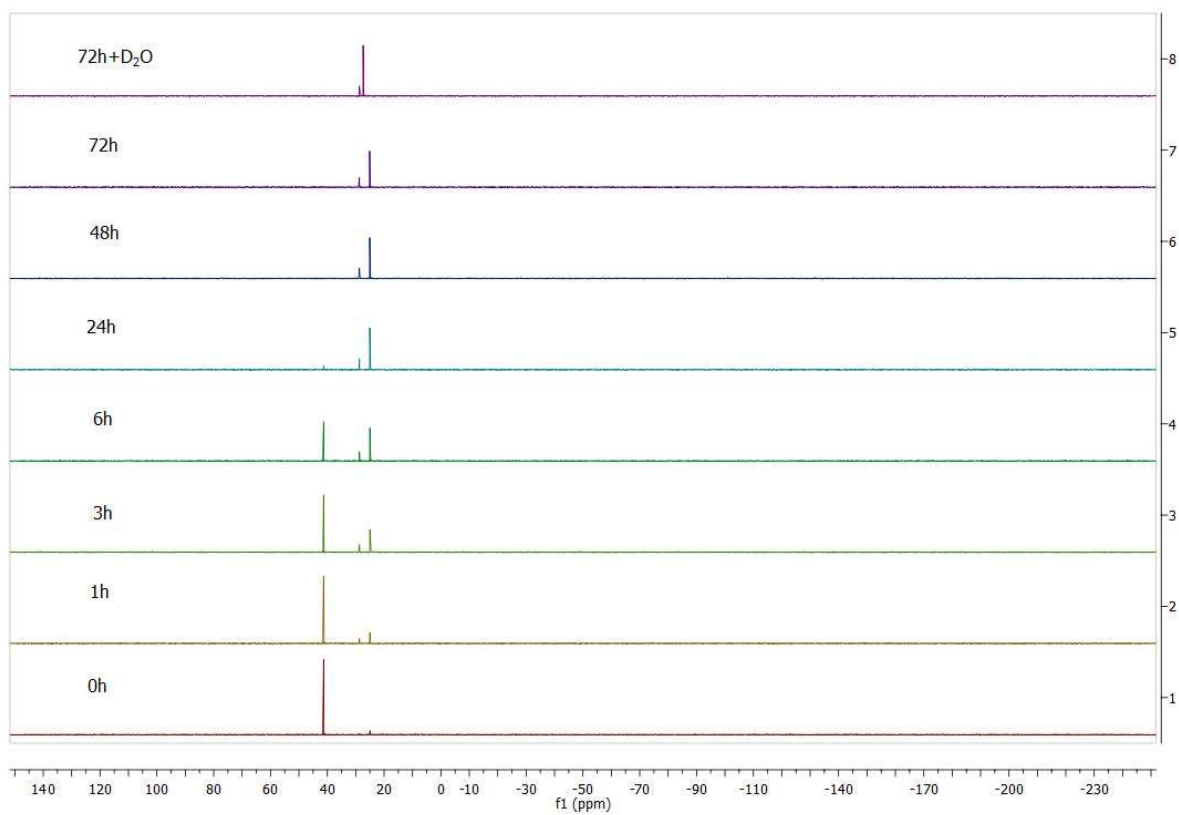

Figure S19.  $^{31}\text{P}$  NMR spectrum of **4** in  $\text{DMSO-}d_6$  over a 72 h time period

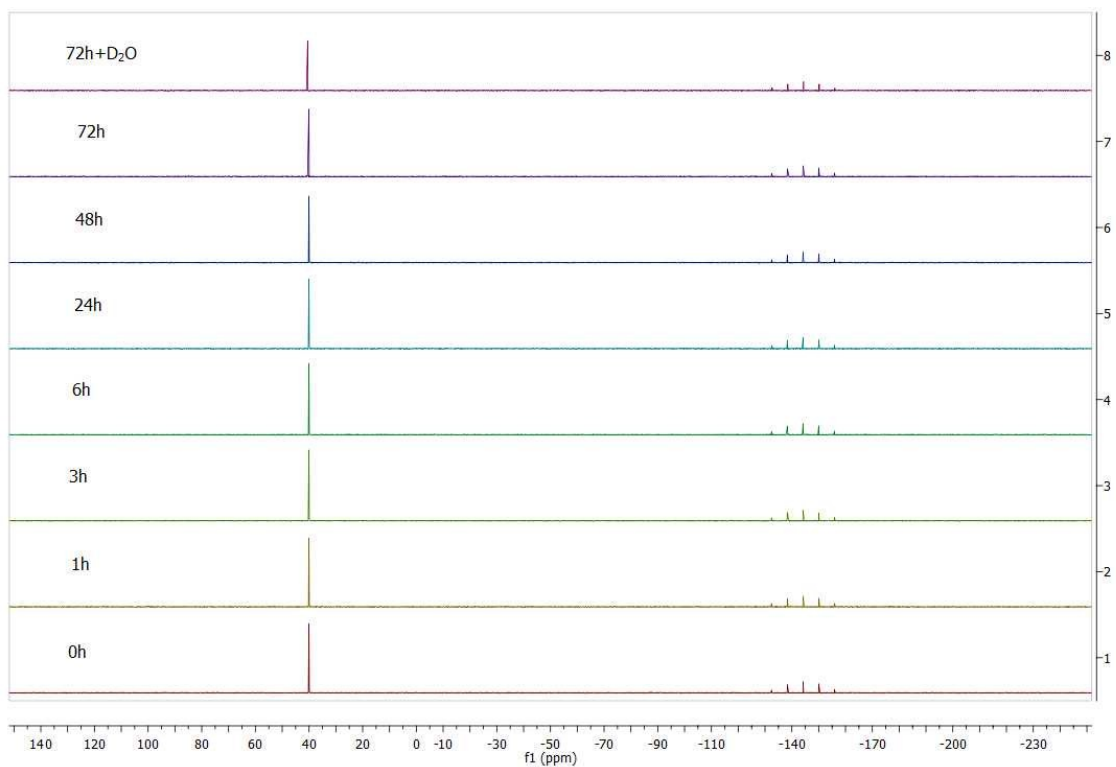

Figure S20. <sup>31</sup>P NMR spectrum of **5** in DMSO-*d*<sub>6</sub> over a 72 h time period

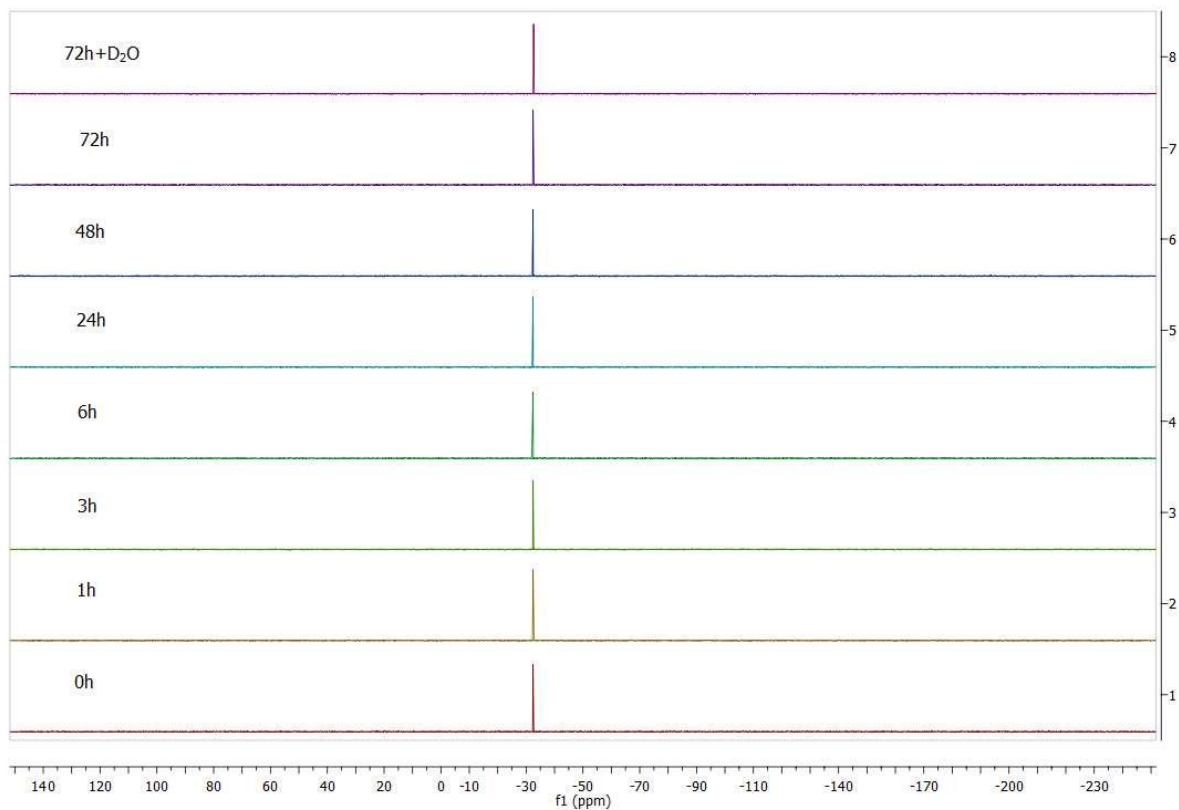

Figure S21. <sup>31</sup>P NMR spectrum of **6** in DMSO-*d*<sub>6</sub> over a 72 h time period

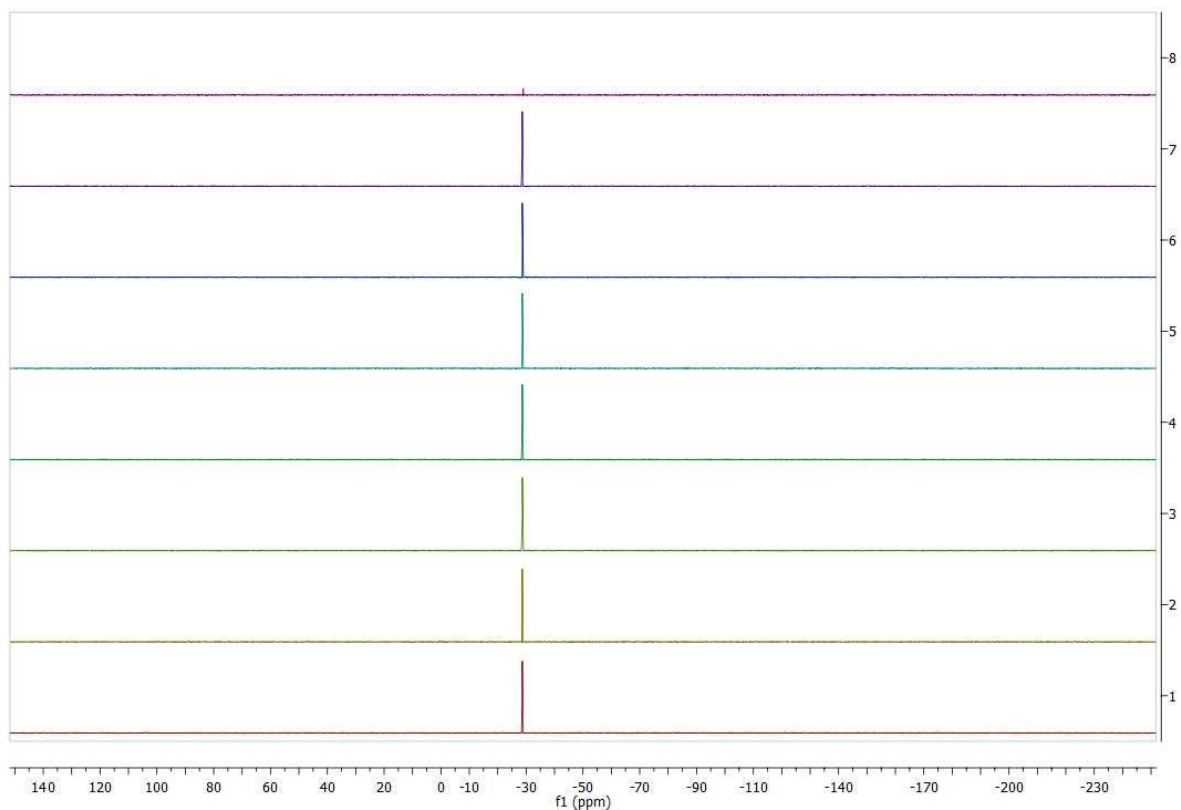

Figure S22.  $^{31}\text{P}$  NMR spectrum of **7** in  $\text{DMSO-}d_6$  over a 72 h time period

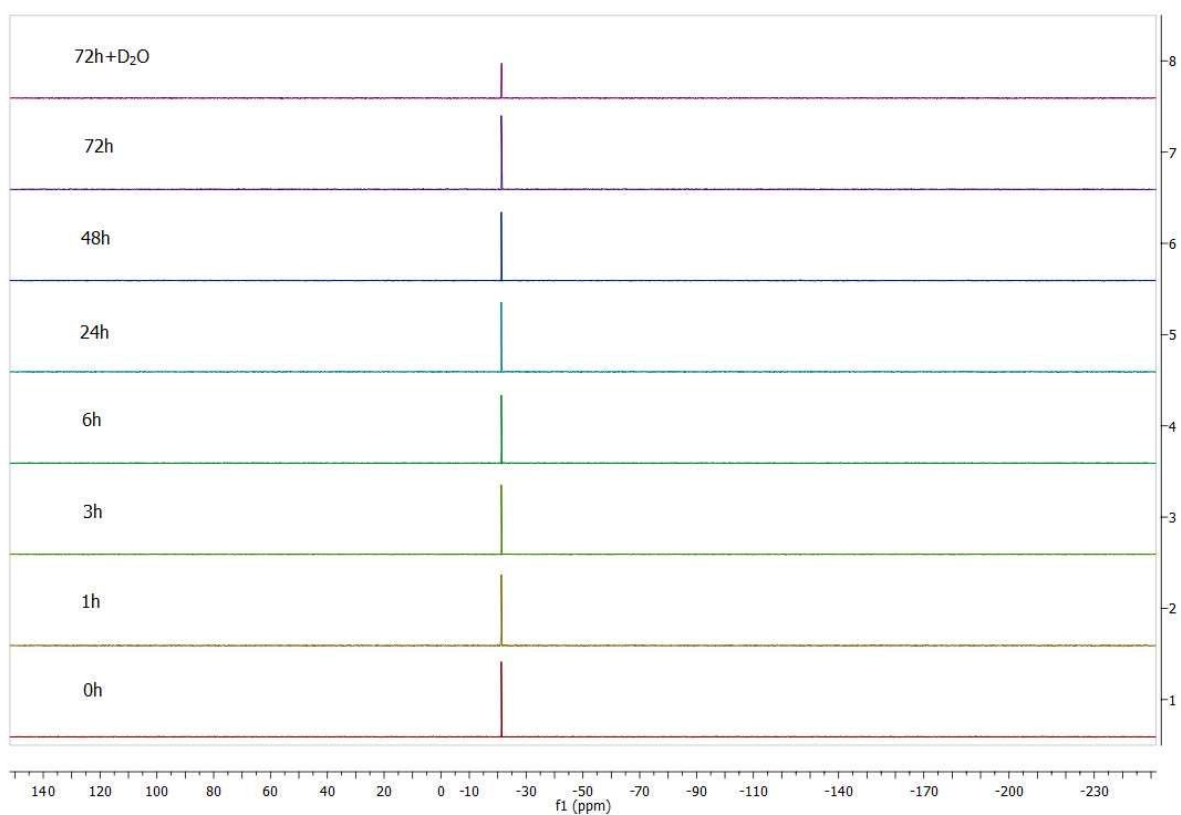

Figure S23.  $^{31}\text{P}$  NMR spectrum of **8** in  $\text{DMSO-}d_6$  over a 72 h time period

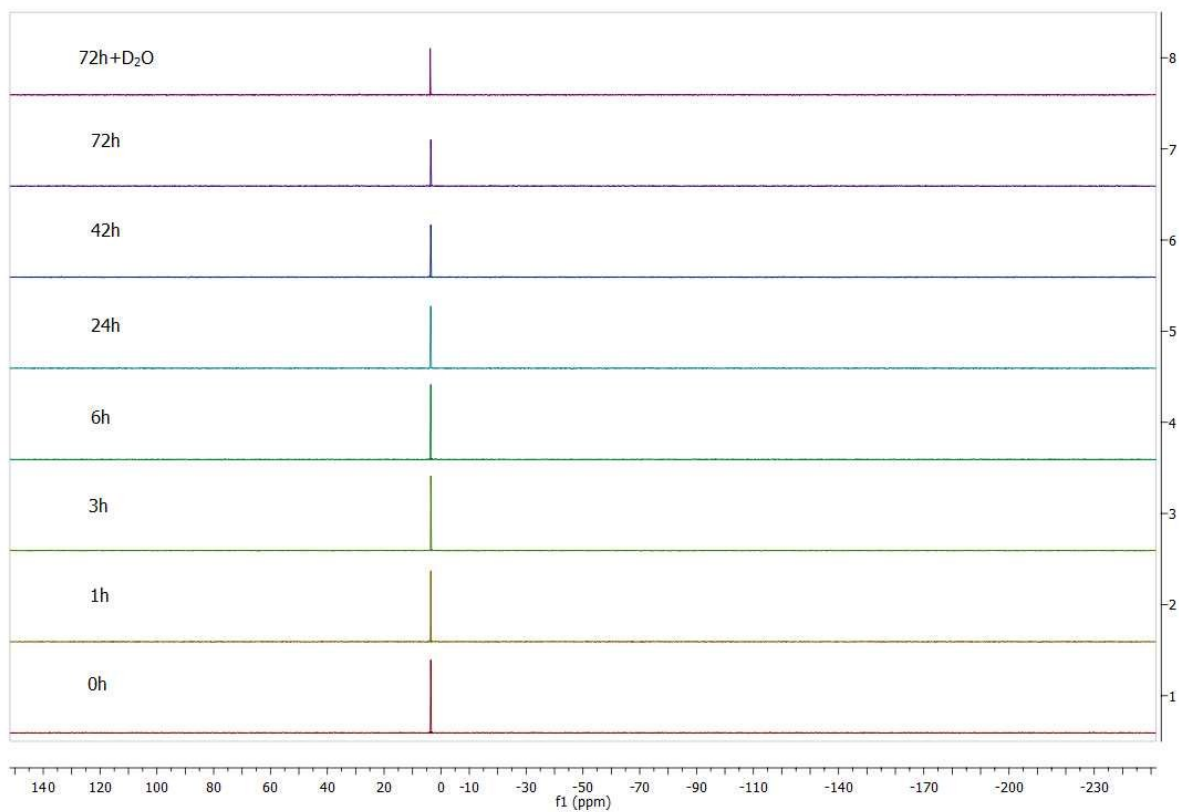

Figure S24.  $^{31}\text{P}$  NMR spectrum of **9** in  $\text{DMSO}-d_6$  over a 72 h time period

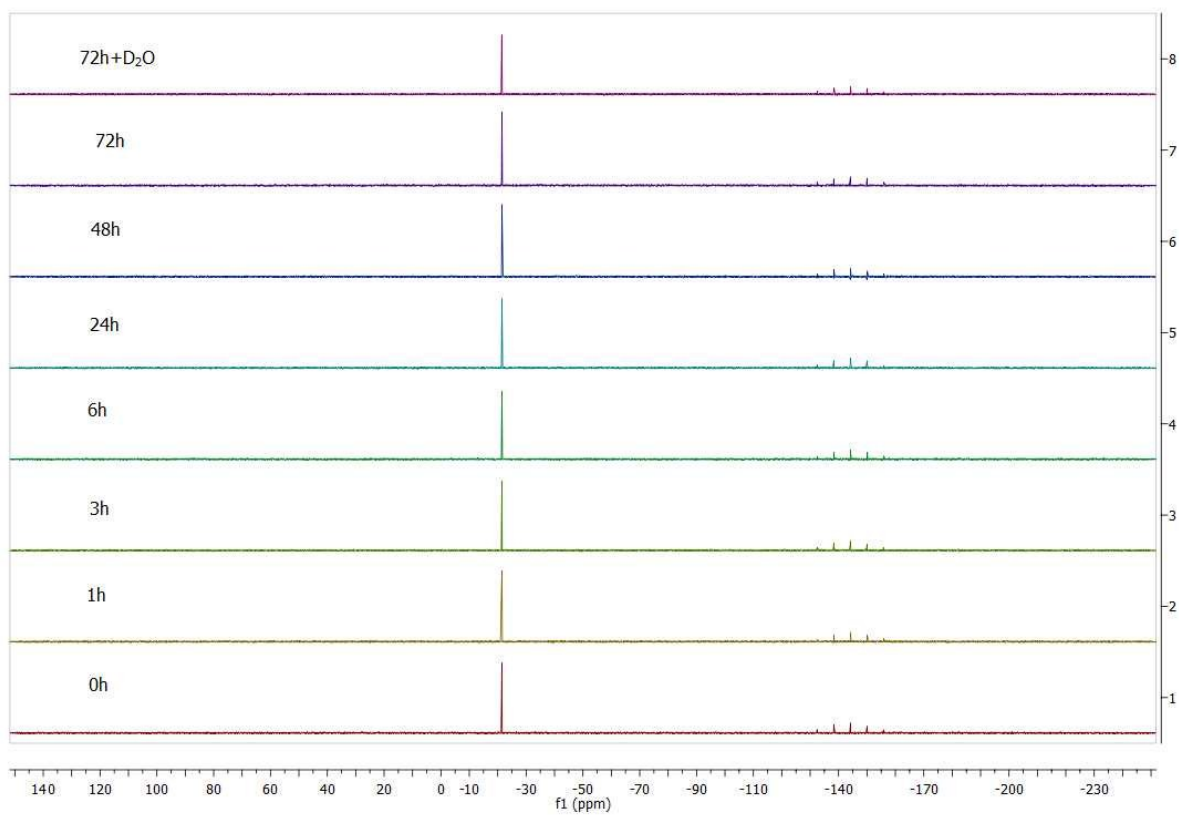

Figure S25.  $^{31}\text{P}$  NMR spectrum of **10** in  $\text{DMSO}-d_6$  over a 72 h time period

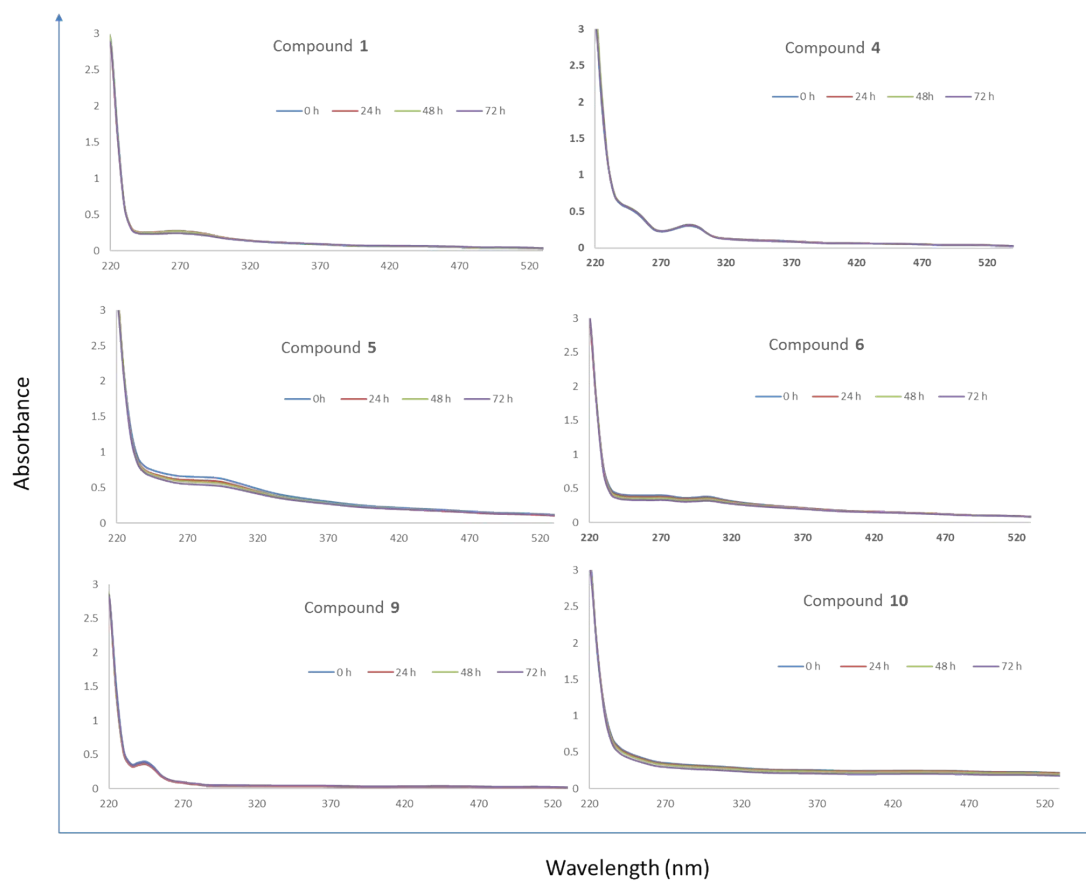

Figure S26. UV-Vis absorption spectra of the gold(I) and gold (III) complexes (25  $\mu\text{M}$ ) in (50 mM) Tris-(150 mM) NaCl buffer (pH 7.2) over 72 h.
